# Supplementary material for: DNA-Methylation-Based Detection of Urological Cancer in Urine: Overview of Biomarkers and Considerations on Biomarker Design, Source of DNA, and Detection Technologies
Source: PubMed Central journal article supplement (PMC6600406; doi:10.3390/ijms20112657), 2019-05-30
Supplement: ijms-20-02657-s001.pdf [file ijms-20-02657-s001.pdf]

## Supplementary Methods

### *Literature Search*

A systematic search was conducted in the PubMed and Embase databases up to February 2019. Search terms used were: “(((Bladder cancer) OR urothelial carcinomas) AND methylation) AND urine”, yielding 169 and 239 articles from PubMed and Embase, respectively; “((prostate cancer) AND methylation) AND urine”, yielding 91 and 162 articles from PubMed and Embase, respectively; “(((Upper urinary tract carcinoma) OR Upper urinary tract cancer) AND methylation) AND urine”, yielding 9 and 0 articles from PubMed and Embase, respectively; and “(((Kidney cancer) OR Renal cancer) AND methylation) AND urine”, yielding 40 and 22 articles from PubMed and Embase, respectively.

### *Selection of Studies*

One author (LKL) screened all published original articles appearing in the above searches for eligibility. Studies using DNA methylation biomarkers for detection of bladder cancer, prostate cancer, kidney cancer, or upper urinary tract cancer in urine were considered eligible. Studies were excluded if they were not original research papers; used a language other than English; or did not report biomarker performance in terms of sensitivity, specificity, or area under the curve (AUC); or reported the performance of DNA methylation markers only in combination with other factors (such as other DNA mutation markers and clinical data). Meeting the inclusion criteria were 57, 27, 2, and 5 articles for bladder cancer, prostate cancer, upper urinary tract cancer, and kidney cancer, respectively.

### *Data Extraction*

Two authors (LKL and CD) independently extracted data from the selected studies and disagreements were discussed until agreement was reached. The data extracted from the articles were obtained both from the primary article and supplementary data and included gene name, reference, study year, number of cases and controls, testing or validation, source of urine, urine processing method, first diagnosis or recurrence, analysis technique, sensitivity, and specificity.

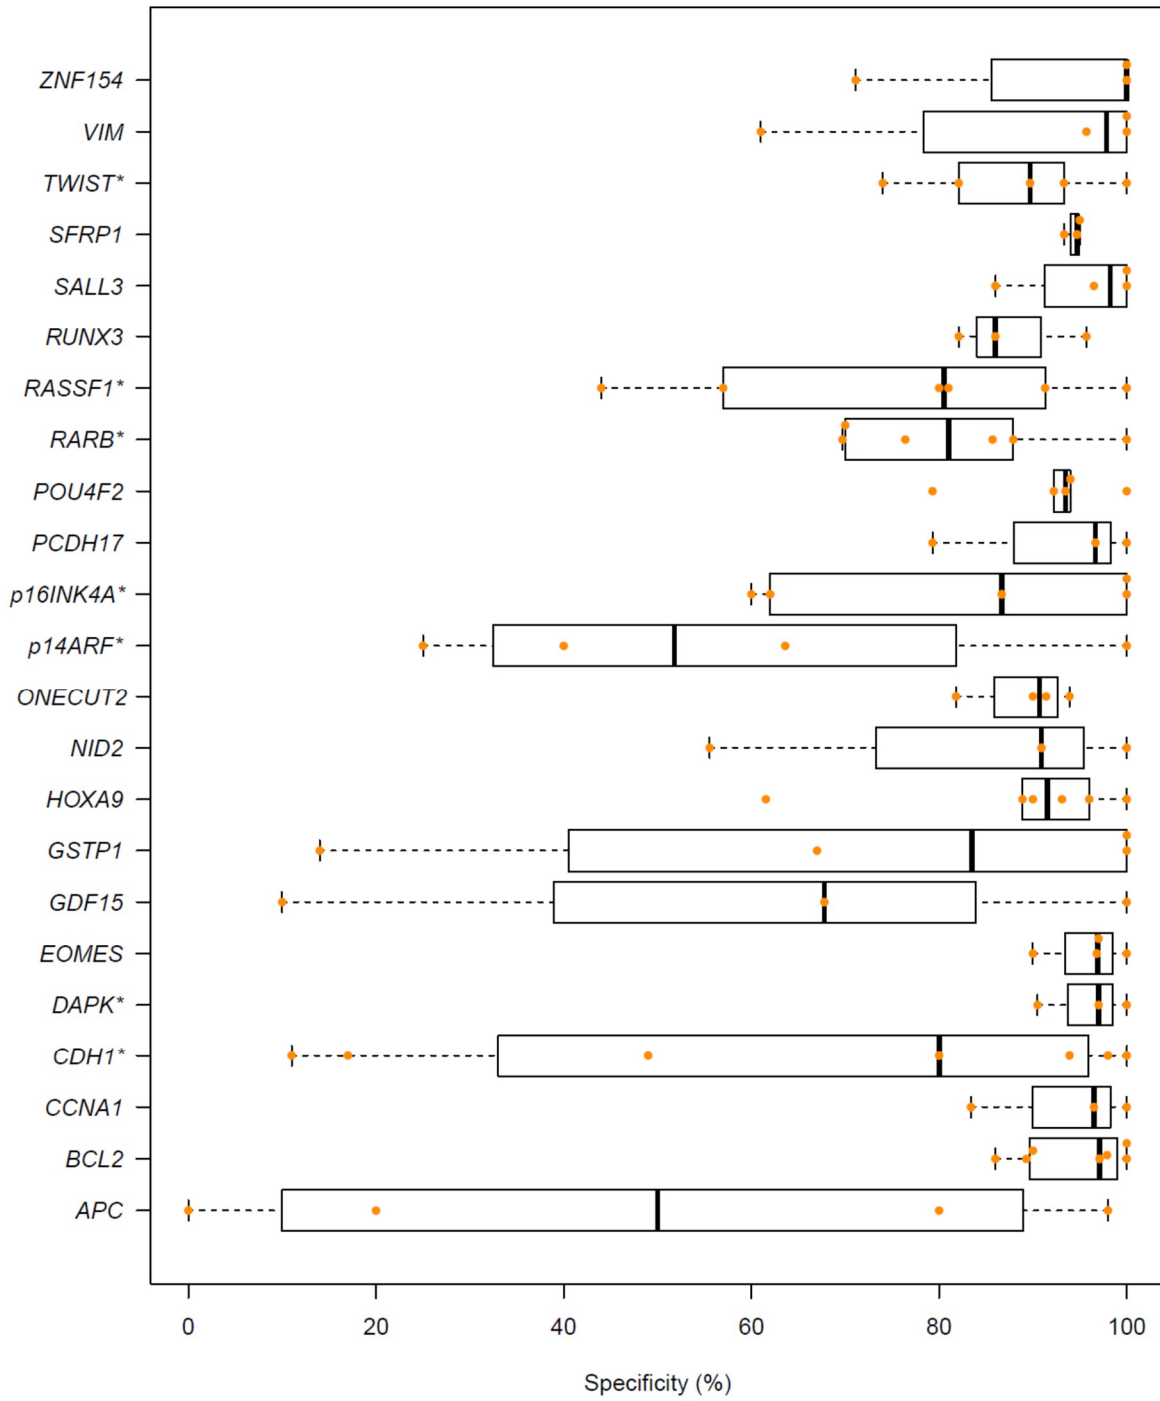

**Supplementary Figure S1.** Reported specificities of DNA-methylation biomarkers for detection of primary bladder cancer. \*, Inconsistent nomenclature among studies.

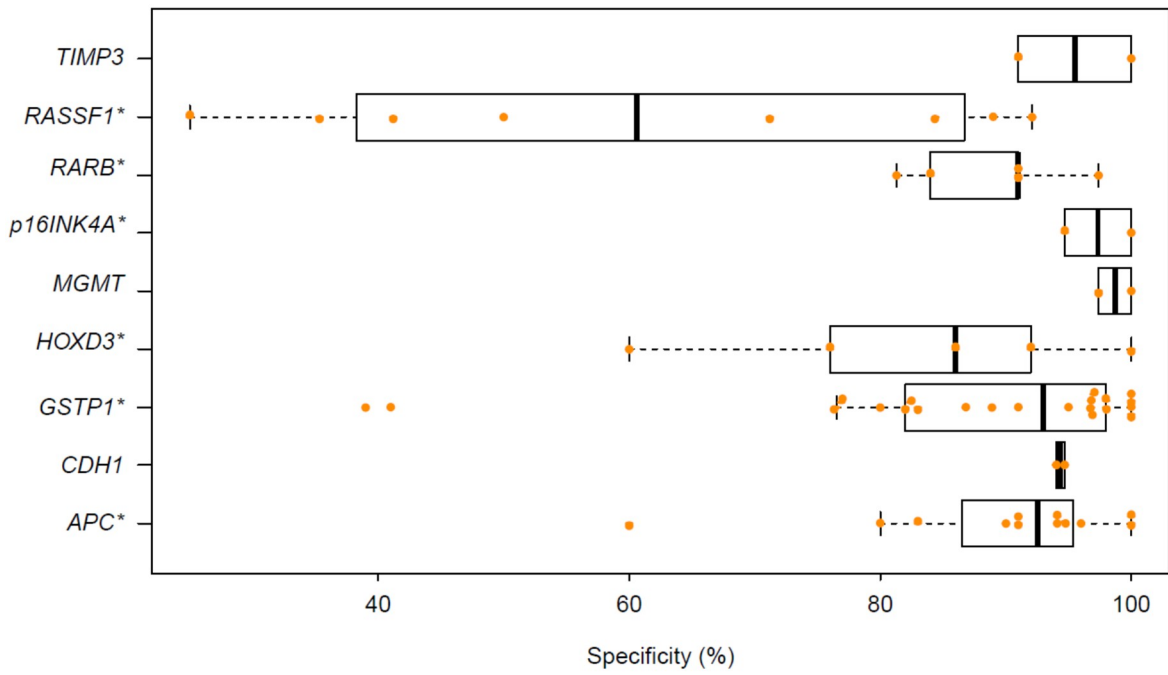

**Supplementary Figure S2.** Reported specificities of DNA-methylation biomarkers for detection of prostate cancer. \*, Inconsistent nomenclature among studies.

Supplementary Table S1. Bladder cancer.

| Biomarker                                          | Primary/Recurrence | Dataset    | Sample Processing | Cases (n) | Controls (n) | Pathology     | Control Population                  | Method         | Sens. (%) |         |     |     |       | Spec. (%) |       |           | AUC   | Ref.  | Year  |         |      |
|----------------------------------------------------|--------------------|------------|-------------------|-----------|--------------|---------------|-------------------------------------|----------------|-----------|---------|-----|-----|-------|-----------|-------|-----------|-------|-------|-------|---------|------|
|                                                    |                    |            |                   |           |              |               |                                     |                | Ta        | Cis/tis | T1  | ≥T2 | Ta-T1 | LG/G2     | HG/G3 | PUNLMP/G1 |       |       |       | Overall |      |
| <i>TWIST1, NID2</i>                                | Primary            | Training   | Sedimentation     | 48        | 121          | Ta-T2, LG, HG | Mixed Urologic Disease              | q-MSP          | 80        | 100     | 100 | 83  | Ta-T1 | 80        | 91    |           | 88    | 94    |       | [15]    | 2010 |
| <i>TWIST1, NID2</i>                                | Primary            | Validation | Sedimentation     | 35        | 57           | Ta-T2, LG, HG | Mixed Urologic Disease              | q-MSP          | 88        | 100     | 100 | 100 | Ta-T1 | 89        | 100   |           | 94    | 91    |       |         | 2010 |
| <i>SOX1, IRAK3, L1-MET (L1-MET hypomethylated)</i> | Recurrent          | Training   | Sedimentation     | 29        | 54           | Ta-T1, LG, HG | Ta-T1, LG, HG                       | Pyrosequencing |           |         |     |     | Ta-T1 |           |       |           | 86    | 89    | 0.90  | [32]    | 2014 |
| <i>SOX1, IRAK3, L1-MET (L1-MET hypomethylated)</i> | Recurrent          | Validation | Sedimentation     | 134       | 25           | Ta-T1, LG, HG | Ta-T1, LG, HG                       | Pyrosequencing |           |         |     |     | Ta-T1 |           |       |           | 80    | 97    | 0.95  |         | 2014 |
| <i>EOMES</i>                                       | Primary            | Training   | Sedimentation     | 58        | 90           | Ta-T4, LG, HG | Mixed urologic diseases and healthy | qMSP           |           |         |     |     | Ta-T1 |           |       |           | 79.31 | 90.00 | 0.906 |         | 2016 |
| <i>GDF15</i>                                       | Primary            | Training   | Sedimentation     | 58        | 90           | Ta-T4, LG, HG | Mixed urologic diseases and healthy | qMSP           |           |         |     |     | Ta-T1 |           |       |           | 67.24 | 67.78 | 0.711 |         | 2016 |
| <i>NID2</i>                                        | Primary            | Training   | Sedimentation     | 58        | 90           | Ta-T4, LG, HG | Mixed urologic diseases and healthy | qMSP           |           |         |     |     | Ta-T1 |           |       |           | 82.76 | 55.56 | 0.703 |         | 2016 |
| <i>PCDH17</i>                                      | Primary            | Training   | Sedimentation     | 58        | 90           | Ta-T4, LG, HG | Mixed urologic diseases and healthy | qMSP           |           |         |     |     | Ta-T1 |           |       |           | 50.00 | 96.67 | 0.813 | [11]    | 2016 |
| <i>POU4F2</i>                                      | Primary            | Training   | Sedimentation     | 58        | 90           | Ta-T4, LG, HG | Mixed urologic diseases and healthy | qMSP           |           |         |     |     | Ta-T1 |           |       |           | 91.38 | 92.22 | 0.921 |         | 2016 |
| <i>TCF21</i>                                       | Primary            | Training   | Sedimentation     | 58        | 90           | Ta-T4, LG, HG | Mixed urologic diseases and healthy | qMSP           |           |         |     |     | Ta-T1 |           |       |           | 86.21 | 82.22 | 0.910 |         | 2016 |
| <i>ZNF154</i>                                      | Primary            | Training   | Sedimentation     | 58        | 90           | Ta-T4, LG, HG | Mixed urologic diseases and healthy | qMSP           |           |         |     |     | Ta-T1 |           |       |           | 91.38 | 71.11 | 0.892 |         | 2016 |

|                              |         |            |                   |     |     |                       |                                               |      |    |       |       |       |       |       |       |      |
|------------------------------|---------|------------|-------------------|-----|-----|-----------------------|-----------------------------------------------|------|----|-------|-------|-------|-------|-------|-------|------|
| <i>POU4F2, EOMES</i>         | Primary | Training   | Sedimentation     | 58  | 90  | Ta-T4, LG, HG         | Mixed urologic diseases and healthy           | qMSP |    |       |       |       | 87.93 | 91.11 | 0.930 | 2016 |
| <i>POU4F2, PCDH17</i>        | Primary | Training   | Sedimentation     | 58  | 90  | Ta-T4, LG, HG         | Mixed urologic diseases and healthy           | qMSP |    |       |       |       | 91.38 | 93.33 | 0.923 | 2016 |
| <i>POU4F2, PCDH17, GDF15</i> | Primary | Training   | Sedimentation     | 58  | 90  | Ta-T4, LG, HG         | Mixed urologic diseases and healthy           | qMSP |    |       |       |       | 91.38 | 87.78 | 0.914 | 2016 |
| <i>POU4F2</i>                | Primary | Validation | Sedimentation     | 72  | 92  | Ta-T4, LG, HG         | Mixed urologic diseases and healthy           | qMSP | 86 | 92.5  | 86.1  | 91.49 | 88.89 | 93.48 |       | 2016 |
| <i>POU4F2, EOMES</i>         | Primary | Validation | Sedimentation     | 72  | 92  | Ta-T4, LG, HG         | Mixed urologic diseases and healthy           | qMSP | 92 | 92.5  | 91.67 | 92.55 | 95.83 | 88.04 |       | 2016 |
| <i>POU4F2, PCDH17</i>        | Primary | Validation | Sedimentation     | 72  | 92  | Ta-T4, LG, HG         | Mixed urologic diseases and healthy           | qMSP | 86 | 92.5  | 86.1  | 91.49 | 88.89 | 94.57 |       | 2016 |
| <i>POU4F2, PCDH17, GDF15</i> | Primary | Validation | Sedimentation     | 72  | 92  | Ta-T4, LG, HG         | Mixed urologic diseases and healthy           | qMSP | 92 | 96.25 | 97.22 | 93.62 | 97.22 | 75.00 |       | 2016 |
| <i>HS3ST2</i>                | Primary |            | Filtration (11µm) | 167 | 105 | Ta-T1 (NMIBC), LG, HG | Patients with negative cystoscopy (hematuria) | qMSP |    |       |       |       | 82.0  | 21.20 |       | 2016 |
| <i>SEPTIN9</i>               | Primary |            | Filtration (11µm) | 167 | 105 | Ta-T1 (NMIBC), LG, HG | Patients with negative cystoscopy (hematuria) | qMSP |    |       |       |       | 90.4  | 67.6  | [20]  | 2016 |
| <i>SLIT2</i>                 | Primary |            | Filtration (11µm) | 167 | 105 | Ta-T1 (NMIBC), LG, HG | Patients with negative cystoscopy (hematuria) | qMSP |    |       |       |       | 90.4  | 18.1  |       | 2016 |

|                               |                   |            |                    |                                    |     |                          |                                               |                |      |     |      |            |       |       |    |    |       |       |          |      |          |
|-------------------------------|-------------------|------------|--------------------|------------------------------------|-----|--------------------------|-----------------------------------------------|----------------|------|-----|------|------------|-------|-------|----|----|-------|-------|----------|------|----------|
| <i>HS3ST2, SEPTIN9</i>        | Primary           |            | Filtration (11µm)  | 167                                | 105 | Ta-T1 (NMIB C), LG, HG   | Patients with negative cystoscopy (hematuria) | qMSP           |      |     |      |            |       |       |    |    |       |       | 20<br>16 |      |          |
| <i>HS3ST2, SLIT2</i>          | Primary           |            | Filtration (11 µm) | 167                                | 105 | Ta-T1 (NMIB C), LG, HG   | Patients with negative cystoscopy (hematuria) | qMSP           |      |     |      |            |       |       |    |    |       |       | 20<br>16 |      |          |
| <i>SEPTIN9, SLIT2</i>         | Primary           |            | Filtration (11 µm) | 167                                | 105 | Ta-T1 (NMIB C), LG, HG   | Patients with negative cystoscopy (hematuria) | qMSP           |      |     |      |            |       |       |    |    |       |       | 20<br>16 |      |          |
| <i>HS3ST2, SEPTIN9, SLIT2</i> | Primary           |            | Filtration (11 µm) | 167                                | 105 | Ta-T1 (NMIB C), LG, HG   | Patients with negative cystoscopy (hematuria) | qMSP           | 90.5 | 100 | 100  | 90 (other) | 89    | 100   |    |    |       |       | 20<br>16 |      |          |
| <i>HS3ST2, SLIT2, SEPTIN9</i> | Recurrent         |            | Filtration (11 µm) | 72                                 | 86  | Ta-T4, LG, HG            | Ta-T4, LG, HG                                 | qMSP           | 89.1 | 100 | 90.9 | 50 (other) | 85.1  | 96    |    |    |       |       | 20<br>16 |      |          |
| <i>TWIST1, NID2</i>           | Primary/Recurrent |            | Sedimentation      | 172 (37% hematuria and 63% NMIB C) |     | Ta-T1, LG, HG            | Patients with negative cystoscopy (hematuria) | q-MSP          |      |     |      |            |       |       |    |    | 0.669 | [63]  | 20<br>17 |      |          |
| <i>CFTR, SALL3, TWIST1</i>    | Primary           | Training   | Sedimentation      | 111                                | 57  | Ta-T2, LG, HG            | Mixed urologic diseases                       | Pyrosequencing |      |     |      |            | 76.6  | 90.62 |    |    | 84.68 | 68.42 | 0.874    | [28] | 20<br>18 |
| <i>CFTR, SALL3, TWIST1</i>    | Recurrent         | Validation | Sedimentation      | 173                                | 285 | Ta-T1                    | Ta-T1                                         | Pyrosequencing |      |     |      |            | 90.62 | 88.31 |    |    | 89.6  | 30.53 | 0.741    |      | 20<br>18 |
| <i>p14ARF</i>                 | Primary           |            | Sedimentation      | 113                                |     | ≥T1, PUNL MP, grades 1-3 | Healthy                                       | MSP            |      |     |      |            | 57    | 27    | 18 | 48 | 24    | 32    |          |      | 20<br>17 |
| <i>p16INK4a</i>               | Primary           |            | Sedimentation      | 113                                |     | ≥T1, PUNL MP, grades 1-3 | Healthy                                       | MSP            |      |     |      |            | 13    | 13    | 9  | 17 | 12    | 12    |          | [19] | 20<br>17 |
| <i>RASSF1A</i>                | Primary           |            | Sedimentation      | 113                                |     | ≥T1, PUNL MP,            | Healthy                                       | MSP            |      |     |      |            | 57    | 44    | 41 | 56 | 35    | 46    |          |      | 20<br>17 |

|                                             |         |               |     |    |  |                          |                                     |      |  |    |    |               |    |      |      |      |      |      |          |
|---------------------------------------------|---------|---------------|-----|----|--|--------------------------|-------------------------------------|------|--|----|----|---------------|----|------|------|------|------|------|----------|
|                                             |         |               |     |    |  | grades 1-3               |                                     |      |  |    |    |               |    |      |      |      |      |      |          |
| <i>DAPK1</i>                                | Primary | Sedimentation | 113 |    |  | ≥T1, PUNL MP, grades 1-3 | Healthy                             | MSP  |  | 22 | 17 | 20            | 13 | 24   | 17   |      |      |      | 20<br>17 |
| <i>APC</i>                                  | Primary | Sedimentation | 113 |    |  | ≥T1, PUNL MP, grades 1-3 | Healthy                             | MSP  |  | 66 | 43 | 43            | 56 | 35   | 46   |      |      |      | 20<br>17 |
| <i>p14ARF, p16INK4A, RASSF1A, DAPK, APC</i> | Primary | Sedimentation | 113 |    |  | ≥T1, PUNL MP, grades 1-3 | Healthy                             | MSP  |  |    |    |               |    |      | 91   | -    |      |      | 20<br>17 |
| <i>RARβ</i>                                 | Primary | Sedimentation | 22  | 17 |  | NMIBC -MIBC, grades 1-3  | Healthy                             | MSP  |  |    |    | 69.2 (LG+ HG) |    | 66.7 | 68.2 | 76.4 |      |      | 20<br>02 |
| <i>DAPK</i>                                 | Primary | Sedimentation | 22  | 17 |  | NMIBC -MIBC, grades 1-3  | Healthy                             | MSP  |  |    |    | 38.4 (LG+ HG) |    | 55.5 | 45.5 | 100  |      |      | 20<br>02 |
| <i>E-cad</i>                                | Primary | Sedimentation | 22  | 17 |  | NMIBC -MIBC, grades 1-3  | Healthy                             | MSP  |  |    |    | 53.8 (LG+ HG) |    | 66.7 | 59.1 | 100  | [21] |      | 20<br>02 |
| <i>p16</i>                                  | Primary | Sedimentation | 22  | 17 |  | NMIBC -MIBC, grades 1-3  | Healthy                             | MSP  |  |    |    | 7.6           |    | 22.2 | 13.6 | 100  |      |      | 20<br>02 |
| <i>RARβ, DAPK, E-cad, p16</i>               | Primary | Sedimentation | 22  | 17 |  | NMIBC -MIBC, grades 1-3  | Healthy                             | MSP  |  |    |    | 84.6 (LG+ HG) |    | 100  | 90.9 | 76.4 |      |      | 20<br>02 |
| <i>APC, RASSF1A, p14ARF</i>                 | Primary |               | 45  | 38 |  | Ta-T4, grades 1-3        | Mixed urologic diseases and healthy | MSP  |  |    |    |               |    |      | 87   | 100  |      | [42] | 20<br>04 |
| <i>BCL2</i>                                 | Primary | Sedimentation | 37  | 20 |  | Ta-T4                    | Healthy                             | qMSP |  |    |    |               |    | 64.9 | NA   |      |      |      | 20<br>04 |
| <i>TERT</i>                                 | Primary | Sedimentation | 37  | 20 |  | Ta-T4                    | Healthy                             | qMSP |  |    |    |               |    | 51.4 | NA   |      |      | [43] | 20<br>04 |
| <i>DAPK</i>                                 | Primary | Sedimentation | 37  | 20 |  | Ta-T4                    | Healthy                             | qMSP |  |    |    |               |    | 21.6 | NA   |      |      |      | 20<br>04 |
| <i>BCL2, TERT, DAPK</i>                     | Primary | Sedimentation | 37  | 20 |  | Ta-T4                    | Healthy                             | qMSP |  |    |    |               |    | 78.4 | 78.4 |      |      |      | 20<br>04 |
| <i>LAMA3</i>                                | Primary | Sedimentation | 71  |    |  | MIBC, NMIBC, LG, HG      |                                     | MSP  |  |    |    |               |    | 39   | NA   |      |      | [64] | 20<br>04 |
| <i>LAMB3</i>                                | Primary | Sedimentation | 71  |    |  | MIBC, NMIBC              |                                     | MSP  |  |    |    |               |    | 19   | NA   |      |      |      | 20<br>04 |

|                                                    |         |               |     |    |  |                                   |                                                     |  |      |      |      |      |      |      |      |       |  |      |      |
|----------------------------------------------------|---------|---------------|-----|----|--|-----------------------------------|-----------------------------------------------------|--|------|------|------|------|------|------|------|-------|--|------|------|
|                                                    |         |               |     |    |  | , LG,<br>HG                       |                                                     |  |      |      |      |      |      |      |      |       |  |      |      |
| LAMC2                                              | Primary | Sedimentation | 71  |    |  | MIBC,<br>NMIBC<br>, LG,<br>HG     | MSP                                                 |  |      |      |      |      |      | 15   | NA   |       |  |      | 2004 |
| LAMA3, LAMB3,<br>LAMC2                             | Primary | Sedimentation | 71  |    |  | MIBC,<br>NMIBC<br>, LG,<br>HG     | MSP                                                 |  |      |      |      |      |      | 49   | NA   |       |  |      | 2004 |
| sFRP-1                                             | Primary | Sedimentation | 24  | 20 |  | MIBC,<br>NMIBC<br>, grades<br>1-3 | Healthy<br>MSP                                      |  | 90   | 35.7 | 63.6 | 75   | 20   | 58.3 | 95   |       |  |      | 2006 |
| sFRP-2                                             | Primary | Sedimentation | 24  | 20 |  | MIBC,<br>NMIBC<br>, grades<br>1-3 | Healthy<br>MSP                                      |  | 90   | 57.1 | 81.8 | 62.5 | 60   | 70.8 | 90   |       |  |      | 2006 |
| sFRP-4                                             | Primary | Sedimentation | 24  | 20 |  | MIBC,<br>NMIBC<br>, grades<br>1-3 | Healthy<br>MSP                                      |  | 70   | 42.9 | 54.5 | 62.5 | 40   | 54.2 | 90   |       |  |      | 2006 |
| sFRP-5                                             | Primary | Sedimentation | 24  | 20 |  | MIBC,<br>NMIBC<br>, grades<br>1-3 | Healthy<br>MSP                                      |  | 90   | 64.3 | 81.8 | 75   | 60   | 75.0 | 95   |       |  | [65] | 2006 |
| Wif-1                                              | Primary | Sedimentation | 24  | 20 |  | MIBC,<br>NMIBC<br>, grades<br>1-3 | Healthy<br>MSP                                      |  | 70   | 35.7 | 45.5 | 62.5 | 40   | 58.3 | 95   |       |  |      | 2006 |
| Dkk-3                                              | Primary | Sedimentation | 24  | 20 |  | MIBC,<br>NMIBC<br>, grades<br>1-3 | Healthy<br>MSP                                      |  | 90   | 35.7 | 63.6 | 75   | 20   | 50.0 | 95   |       |  |      | 2006 |
| sFRP-1, sFRP-2,<br>sFRP-4, sFRP-5, Wif-1,<br>Dkk-3 | Primary | Sedimentation | 24  | 20 |  | MIBC,<br>NMIBC<br>, grades<br>1-3 | Healthy<br>MSP                                      |  | 83.3 | 45.2 | 65.2 | 68.8 | 33.3 | 61.1 | 93.3 | 0.763 |  |      | 2006 |
| CDKN2A                                             | Primary | Sedimentation | 175 | 69 |  | Ta-T4,<br>grades<br>1-3           | Mixed<br>urologic<br>diseases,<br>hematuria<br>qMSP |  |      |      |      |      |      | 45   | NA   |       |  |      | 2006 |
| ARF                                                | Primary | Sedimentation | 175 | 69 |  | Ta-T4,<br>grades<br>1-3           | Mixed<br>urologic<br>diseases,<br>hematuria<br>qMSP |  |      |      |      |      |      | 28   | NA   |       |  |      | 2006 |
| MGMT                                               | Primary | Sedimentation | 175 | 69 |  | Ta-T4,<br>grades<br>1-3           | Mixed<br>urologic<br>diseases,<br>hematuria<br>qMSP |  |      |      |      |      |      | 35   | NA   |       |  | [66] | 2006 |
| GSTP1                                              | Primary | Sedimentation | 175 | 69 |  | Ta-T4,<br>grades<br>1-3           | Mixed<br>urologic<br>diseases,<br>hematuria<br>qMSP |  |      |      |      |      |      | 43   | NA   |       |  |      | 2006 |
| CDKN2A, ARF,<br>MGMT, GSTP1                        | Primary | Sedimentation | 175 | 69 |  | Ta-T4,<br>grades<br>1-3           | Mixed<br>urologic<br>qMSP                           |  | 85   | 75   |      |      |      | 69   | 100  |       |  |      | 2006 |



|                                       |         |               |           |                           |                       |                                           |      |      |                   |      |      |      |         |      |       |  |  |      |          |
|---------------------------------------|---------|---------------|-----------|---------------------------|-----------------------|-------------------------------------------|------|------|-------------------|------|------|------|---------|------|-------|--|--|------|----------|
|                                       |         |               |           |                           |                       | diseases,<br>hematuria                    |      |      |                   |      |      |      |         |      |       |  |  |      |          |
| <i>RASSF1A, E-cad, APC</i>            | Primary | Sedimentation | 35        | (>70 y)=35/<br>(<40 Y)=34 | Ta-T4                 | Hematuria or lower urinary tract symptoms | qMSP |      |                   |      |      | 69   | 60      |      |       |  |  |      | 20<br>06 |
| <i>RASSF1A</i>                        | Primary | Sedimentation | 35        | (>70 y)=35/<br>(<40 Y)=34 | Ta-T4                 | Hematuria or lower urinary tract symptoms | qMSP |      |                   |      |      | 51   | 57/74   |      |       |  |  |      | 20<br>06 |
| <i>E-cad</i>                          | Primary | Sedimentation | 35        | (>70 y)=35/<br>(<40 Y)=34 | Ta-T4                 | Hematuria or lower urinary tract symptoms | qMSP |      |                   |      |      | 31   | 49/62   |      |       |  |  |      | 20<br>06 |
| <i>RAR-B</i>                          | Primary | Sedimentation | 35        | (>70 y)=35/<br>(<40 Y)=34 | Ta-T4                 | Hematuria or lower urinary tract symptoms | qMSP |      |                   |      |      | 3    | 100/100 |      |       |  |  |      | 20<br>06 |
| <i>pl4</i>                            | Primary | Sedimentation | 35        | (>70 y)=35/<br>(<40 Y)=34 | Ta-T4                 | Hematuria or lower urinary tract symptoms | qMSP |      |                   |      |      | 0    | 100/100 |      |       |  |  | [67] | 20<br>06 |
| <i>pl6</i>                            | Primary | Sedimentation | 35        | (>70 y)=35/<br>(<40 Y)=34 | Ta-T4                 | Hematuria or lower urinary tract symptoms | qMSP |      |                   |      |      | 0    | 100/100 |      |       |  |  |      | 20<br>06 |
| <i>DAPK</i>                           | Primary | Sedimentation | 35        | (>70 y)=35/<br>(<40 Y)=34 | Ta-T4                 | Hematuria or lower urinary tract symptoms | qMSP |      |                   |      |      | 6    | 97/94   |      |       |  |  |      | 20<br>06 |
| <i>GSTP1</i>                          | Primary | Sedimentation | 35        | (>70 y)=35/<br>(<40 Y)=34 | Ta-T4                 | Hematuria or lower urinary tract symptoms | qMSP |      |                   |      |      | 3    | 100/100 |      |       |  |  |      | 20<br>06 |
| <i>APC</i>                            | Primary | Sedimentation | 35        | (>70 y)=35/<br>(<40 Y)=34 | Ta-T4                 | Hematuria or lower urinary tract symptoms | qMSP |      |                   |      |      | 40   | 80/88   |      |       |  |  |      | 20<br>06 |
| <i>HOXA9, PCDH17, POU4F2, ONECUT2</i> | Primary | Sedimentation | Total=111 |                           | Ta-T4, LG, HG PUNL MP | Mixed urologic diseases, hematuria        | qMSP | 85.5 | 96.3 (CIS+ T1-T4) | 91.5 | 88.4 | 33.3 | 90.5    | 73.2 | 0.871 |  |  |      | 20<br>18 |
| <i>HOXA9</i>                          | Primary | Sedimentation | Total=111 |                           | Ta-T4, LG, HG PUNL MP | Mixed urologic diseases, hematuria        | qMSP |      |                   |      |      | 50.9 | 93.1    |      |       |  |  | [22] | 20<br>18 |
| <i>PCDH17</i>                         | Primary | Sedimentation | Total=111 |                           | Ta-T4, LG, HG         | Mixed urologic                            | qMSP |      |                   |      |      | 47.2 | 79.3    |      |       |  |  |      | 20<br>18 |

|                     |         |               |           |     |                       |                                            |      |  |      |      |      |      |      |       |  |      |      |
|---------------------|---------|---------------|-----------|-----|-----------------------|--------------------------------------------|------|--|------|------|------|------|------|-------|--|------|------|
|                     |         |               |           |     | PUNL MP               | diseases, hematuria                        |      |  |      |      |      |      |      |       |  |      |      |
| <i>POU4F2</i>       | Primary | Sedimentation | Total=111 |     | Ta-T4, LG, HG PUNL MP | Mixed urologic diseases, hematuria         | qMSP |  |      |      |      | 77.4 | 79.3 |       |  |      | 2018 |
| <i>ONECUT2</i>      | Primary | Sedimentation | Total=111 |     | Ta-T4, LG, HG PUNL MP | Mixed urologic diseases, hematuria         | qMSP |  |      |      |      | 56.6 | 91.4 |       |  |      | 2018 |
| <i>CDH1</i>         | Primary | Sedimentation | 48        | 35  | Ta-T3, LG, HG         | Healthy                                    | MSP  |  | 61.5 | 68.8 | 66.7 | 67.4 | 93.9 |       |  |      | 2018 |
| <i>p14ARF</i>       | Primary | Sedimentation | 48        | 35  | Ta-T3, LG, HG         | Healthy                                    | MSP  |  | 76.9 | 68.8 | 75   | 72.1 | 63.6 |       |  | [68] | 2018 |
| <i>CDH1, p14ARF</i> | Primary | Sedimentation | 48        | 35  | Ta-T3, LG, HG         | Healthy                                    | MSP  |  |      |      | 83.3 | 86.0 | 97.0 |       |  |      | 2018 |
| <i>ABCC6</i>        | Primary | Sedimentation | 109       | 256 | Ta-T4, LG, HG         | Mixed urologic diseases, negative findings | MSP  |  |      |      |      | 52   | 53   | 0.527 |  |      | 2018 |
| <i>BRCA1</i>        | Primary | Sedimentation | 109       | 256 | Ta-T4, LG, HG         | Mixed urologic diseases, negative findings | MSP  |  |      |      |      | 33   | 58   | 0.453 |  |      | 2018 |
| <i>GDF15</i>        | Primary | Sedimentation | 109       | 256 | Ta-T4, LG, HG         | Mixed urologic diseases, negative findings | MSP  |  |      |      |      | 81   | 10   | 0.452 |  |      | 2018 |
| <i>HSPA2</i>        | Primary | Sedimentation | 109       | 256 | Ta-T4, LG, HG         | Mixed urologic diseases, negative findings | MSP  |  |      |      |      | 73   | 36   | 0.548 |  |      | 2018 |
| <i>RASSF1A</i>      | Primary | Sedimentation | 109       | 256 | Ta-T4, LG, HG         | Mixed urologic diseases, negative findings | MSP  |  |      |      |      | 51   | 81   | 0.624 |  | [69] | 2018 |
| <i>SALL3</i>        | Primary | Sedimentation | 109       | 256 | Ta-T4, LG, HG         | Mixed urologic diseases, negative findings | MSP  |  |      |      |      | 28   | 86   | 0.540 |  |      | 2018 |
| <i>THBS1</i>        | Primary | Sedimentation | 109       | 256 | Ta-T4, LG, HG         | Mixed urologic diseases, negative findings | MSP  |  |      |      |      | 84   | 25   | 0.546 |  |      | 2018 |
| <i>TMEFF2</i>       | Primary | Sedimentation | 109       | 256 | Ta-T4, LG, HG         | Mixed urologic diseases, negative findings | MSP  |  |      |      |      | 68   | 40   | 0.539 |  |      | 2018 |

|                                    |         |                |     |     |                       |                                            |                |      |      |      |      |      |      |       |           |
|------------------------------------|---------|----------------|-----|-----|-----------------------|--------------------------------------------|----------------|------|------|------|------|------|------|-------|-----------|
| <i>CDH1</i>                        | Primary | Sedimentation  | 109 | 256 | Ta-T4, LG, HG         | Mixed urologic diseases, negative findings | MSP            |      |      |      |      | 13   | 98   | 0.555 | 2018      |
| <i>VIM</i>                         | Primary | Sedimentation  | 109 | 256 | Ta-T4, LG, HG         | Mixed urologic diseases, negative findings | MSP            |      |      |      |      | 70   | 61   | 0.654 | 2018      |
| <i>VIM, RASSF1A</i>                | Primary | Sedimentation  | 109 | 256 | Ta-T4, LG, HG         | Mixed urologic diseases, negative findings | MSP            |      |      |      |      | 73   | 63   | 0.718 | 2018      |
| <i>VIM, RASSF1A, GDF15</i>         | Primary | Sedimentation  | 109 | 256 | Ta-T4, LG, HG         | Mixed urologic diseases, negative findings | MSP            |      |      |      |      | 45   | 91   | 0.746 | 2018      |
| <i>VIM, RASSF1A, GDF15, TMEFF2</i> | Primary | Sedimentation  | 109 | 256 | Ta-T4, LG, HG         | Mixed urologic diseases, negative findings | MSP            |      |      |      |      | 82   | 53   | 0.760 | 2018      |
| <i>RBBP8</i>                       | Primary | Sedimentation  | 22  | 10  | Ta-T4, LG, HG         | Healthy donors                             | MSP            |      |      |      |      | 50   | 100  |       | 2018      |
| <i>RBBP8</i>                       | Primary | Sedimentation  | 52  | 51  | Ta-T4, LG, HG         | Mixed urologic diseases, disease free      | Pyrosequencing |      |      |      |      | 51.9 | 90.9 | 0.730 | [70] 2018 |
| <i>ONECUT2</i>                     | Primary | Filtration 8µm | 99  | 376 | Ta-T4, LG, HG, PUNLMP | Macroscopic hematuria, no malignancy       | qMSP           | 58.7 | 100  | 93.9 | 92.3 | 77.8 | 93.9 |       | 2016      |
| <i>VIM</i>                         | Primary | Filtration 8µm | 99  | 376 | Ta-T4, LG, HG, PUNLMP | Macroscopic hematuria, no malignancy       | qMSP           | 69.6 | 71.4 | 81.8 | 84.6 | 75.8 | 95.7 |       | 2016      |
| <i>SALL3</i>                       | Primary | Filtration 8µm | 99  | 376 | Ta-T4, LG, HG, PUNLMP | Macroscopic hematuria, no malignancy       | qMSP           | 47.8 | 85.7 | 84.8 | 84.6 | 67.7 | 96.5 |       | [23] 2016 |
| <i>CCNA1</i>                       | Primary | Filtration 8µm | 99  | 376 | Ta-T4, LG, HG, PUNLMP | Macroscopic hematuria, no malignancy       | qMSP           | 54.3 | 71.4 | 78.8 | 76.9 | 66.7 | 96.5 |       | 2016      |

|                                                        |         |            |                     |    |     |                                    |                                                        |      |          |      |          |      |    |      |      |               |               |
|--------------------------------------------------------|---------|------------|---------------------|----|-----|------------------------------------|--------------------------------------------------------|------|----------|------|----------|------|----|------|------|---------------|---------------|
| <i>BCL2</i>                                            | Primary |            | Filtration<br>8µm   | 99 | 376 | Ta-T4,<br>LG,<br>HG,<br>PUNL<br>MP | Macroscopic<br>hematuria<br>, no<br>malignancy         | qMSP | 54.<br>3 | 71.4 | 69.<br>7 | 69.2 |    | 62.6 | 97.9 | 20<br>16      |               |
| <i>EOMES</i>                                           | Primary |            | Filtration<br>8µm   | 99 | 376 | Ta-T4,<br>LG,<br>HG,<br>PUNL<br>MP | Macroscopic<br>hematuria<br>, no<br>malignancy         | qMSP | 39.<br>1 | 42.9 | 60.<br>6 | 30.8 |    | 45.5 | 96.8 | 20<br>16      |               |
| <i>ONECUT2, VIM,<br/>SALL3, CCNA1,<br/>BCL2, EOMES</i> | Primary |            | Filtration<br>8µm   | 99 | 376 | Ta-T4,<br>LG,<br>HG,<br>PUNL<br>MP | Macroscopic<br>hematuria<br>, no<br>malignancy         | qMSP |          |      |          |      |    | 89.9 | 88.6 | 20<br>16      |               |
| <i>IRF8</i>                                            | Primary |            | Sedimentation       | 26 | 19  | Ta-T4,<br>LG, HG                   | Noncancer,<br>not<br>specified                         | qMSP |          |      |          |      | 50 | 68.8 | 61.5 | 94.7          | 20<br>15      |
| <i>SFRP1</i>                                           | Primary |            | Sedimentation       | 26 | 19  | Ta-T4,<br>LG, HG                   | Noncancer,<br>not<br>specified                         | qMSP |          |      |          |      | 60 | 43.8 | 50   | 94.7          | 20<br>15      |
| <i>ZNF671</i>                                          | Primary |            | Sedimentation       | 26 | 19  | Ta-T4,<br>LG, HG                   | Noncancer,<br>not<br>specified                         | qMSP |          |      |          |      | 40 | 68.8 | 57.7 | 89.5          | 20<br>15      |
| <i>IRF8, SFRP1</i>                                     | Primary |            | Sedimentation       | 26 | 19  | Ta-T4,<br>LG, HG                   | Noncancer,<br>not<br>specified                         | qMSP |          |      |          |      | 90 | 87.5 | 88.4 | 89.5          | 20<br>15      |
| <i>ZNF671, IRF8</i>                                    | Primary |            | Sedimentation       | 26 | 19  | Ta-T4,<br>LG, HG                   | Noncancer,<br>not<br>specified                         | qMSP |          |      |          |      | 60 | 94.1 | 80.8 | 84.2          | [12] 20<br>15 |
| <i>ZNF671, SFRP1</i>                                   | Primary |            | Sedimentation       | 26 | 19  | Ta-T4,<br>LG, HG                   | Noncancer,<br>not<br>specified                         | qMSP |          |      |          |      | 80 | 87.5 | 84.6 | 89.5          | 20<br>15      |
| <i>ZNF671, SFRP1, IRF8</i>                             | Primary |            | Sedimentation       | 26 | 19  | Ta-T4,<br>LG, HG                   | Noncancer,<br>not<br>specified                         | qMSP |          |      |          |      | 90 | 100  | 96.2 | 84.2          | 20<br>15      |
| <i>ZNF671</i>                                          | Primary | Training   | Sedimentation       | 69 | 28  | Ta-T4,<br>LG, HG                   | Noncancer,<br>not<br>specified                         | qMSP |          |      |          |      | 45 | 40   | 42   | 92.8          | 20<br>15      |
| <i>ZNF671</i>                                          | Primary | Validation | Sedimentation       | 33 | 28  | Ta-T4,<br>LG, HG                   | Noncancer,<br>not<br>specified                         | qMSP |          |      |          |      | 33 | 52   | 48   | 89            | 20<br>15      |
| <i>BCL2</i>                                            | Primary |            |                     |    |     |                                    |                                                        | qMSP |          |      |          |      |    | NA   | NA   | 20<br>15      |               |
| <i>EOMES</i>                                           | Primary |            | Filtration<br>(8µm) | 33 | 26  | Ta-T2,<br>LG,<br>HG,<br>PUNL<br>MP | Mixed<br>urologic<br>diseases,<br>negative<br>findings | qMSP |          |      |          |      |    | 29   | NA   | [14] 20<br>15 |               |
| <i>VIM</i>                                             | Primary |            | Filtration<br>(8µm) | 33 | 26  | Ta-T2,<br>LG,<br>HG,<br>PUNL<br>MP | Mixed<br>urologic<br>diseases,<br>negative<br>findings | qMSP |          |      |          |      |    | 81   | NA   | 20<br>15      |               |

|                                                       |         |                      |              |    |                        |                                            |      |            |    |                             |                            |      |      |      |       |      |          |
|-------------------------------------------------------|---------|----------------------|--------------|----|------------------------|--------------------------------------------|------|------------|----|-----------------------------|----------------------------|------|------|------|-------|------|----------|
| <i>SALL3</i>                                          | Primary | Filtration (8µm)     | 33           | 26 | Ta-T2, LG, HG, PUNL MP | Mixed urologic diseases, negative findings | qMSP |            |    |                             |                            |      | NA   | NA   |       |      | 20<br>15 |
| <i>CCNA1</i>                                          | Primary | Filtration (8µm)     | 33           | 26 | Ta-T2, LG, HG, PUNL MP | Mixed urologic diseases, negative findings | qMSP |            |    |                             |                            |      | NA   | NA   |       |      | 20<br>15 |
| <i>HOXA9</i>                                          | Primary | Filtration (8µm)     | 33           | 26 | Ta-T2, LG, HG, PUNL MP | Mixed urologic diseases, negative findings | qMSP |            |    |                             |                            |      | 74   | NA   |       |      | 20<br>15 |
| <i>BCL2, EOMES, VIM, SALL3, CCNA1, HOXA9, POU4F2</i>  | Primary | Filtration (8µm)     | 33           | 26 | Ta-T2, LG, HG, PUNL MP | Mixed urologic diseases, negative findings | qMSP |            |    |                             |                            |      | 94   | NA   |       |      | 20<br>15 |
| <i>TWIST1, NID2</i>                                   | Primary | NA                   | 222 (25% BC) |    | Ta-T1, LG, HG          | Negative findings                          | qMSP |            |    |                             |                            |      | 75   | 86   | 0.656 | [71] | 20<br>15 |
| <i>CCND2</i>                                          | Primary | Sedimentation        | 148          | 56 | Stage 1-3, LG, HG      | Normal controls, not specified             | qMSP |            |    | 38.1, Invasive (stage 2, 3) | 9.3 Noninvasive (stage 1)  | 34.6 | 12.5 | 25.6 | 100   |      | 20<br>14 |
| <i>CCNA1</i>                                          | Primary | Sedimentation        | 73           | 60 | Stage 1-3, LG, HG      | Normal controls, not specified             | qMSP |            |    | 69.4 Invasive (stage 2, 3)  | 56.3 Noninvasive (stage 1) | 67.3 | 50   | 68.4 | 83.4  | [72] | 20<br>14 |
| <i>CALCA</i>                                          | Primary | Sedimentation        | 148          | 56 | Stage 1-3, LG, HG      | Normal controls, not specified             | qMSP |            |    | 72.8 Invasive (stage 2, 3)  | 53.1 Noninvasive (stage 1) | 75.2 | 33.3 | 63.5 | 71.5  |      | 20<br>14 |
| <i>VGF</i>                                            | Primary | Sedimentation        | 20           | 20 |                        |                                            | qMSP |            |    |                             |                            |      |      | 40   | 95    | [73] | 20<br>14 |
| <i>CCNA1, EOMES, HOXA9, POU4F2, SALL3, VIM2, BCL2</i> | Primary | Sedimentation        | 189          |    | ≥Ta                    |                                            | qMSP | 75 (LG Ta) | 92 | 90                          | 89                         |      |      | 80   |       | [46] | 20<br>14 |
| <i>CCNA1, EOMES, HOXA9, POU4F2, SALL3, VIM2, BCL2</i> | Primary | Filtered cells (8µm) | 187          |    |                        |                                            | qMSP | 84 (LG Ta) | 96 | 93                          | 95                         |      |      | 87   |       | [46] | 20<br>14 |

|                     |         |          |               |     |     |                            |                                    |              |    |    |    |  |    |    |    |           |           |       |    |      |      |          |          |
|---------------------|---------|----------|---------------|-----|-----|----------------------------|------------------------------------|--------------|----|----|----|--|----|----|----|-----------|-----------|-------|----|------|------|----------|----------|
| <i>TWIST1, NID2</i> | Primary |          | Sedimentation | 24  | 87  |                            |                                    |              |    |    |    |  |    |    |    |           |           | 38    | 86 | 0.71 | [74] | 20<br>14 |          |
| <i>OTX</i>          | Primary |          | Sedimentation | 54  | 115 | ≥Ta, grade 1-3             | Hematuria with nonmalignant causes | qMSP (SNUPE) |    |    |    |  |    |    |    |           |           |       |    |      | 0.69 |          | 20<br>13 |
| <i>ONECUT</i>       | Primary |          | Sedimentation | 54  | 115 | ≥Ta, grade 1-3             | Hematuria with nonmalignant causes | qMSP (SNUPE) |    |    |    |  |    |    |    |           |           |       |    |      | 0.78 |          | 20<br>13 |
| <i>OSR</i>          | Primary |          | Sedimentation | 54  | 115 | ≥Ta, grade 1-3             | Hematuria with nonmalignant causes | qMSP (SNUPE) |    |    |    |  |    |    |    |           |           |       |    |      | 0.75 | [75]     | 20<br>13 |
| <i>SIM</i>          | Primary |          | Sedimentation | 54  | 115 | ≥Ta, grade 1-3             | Hematuria with nonmalignant causes | qMSP (SNUPE) |    |    |    |  |    |    |    |           |           |       |    |      | 0.60 |          | 20<br>13 |
| <i>MEIS</i>         | Primary |          | Sedimentation | 54  | 115 | ≥Ta, grade 1-3             | Hematuria with nonmalignant causes | qMSP (SNUPE) |    |    |    |  |    |    |    |           |           |       |    |      | 0.71 |          | 20<br>13 |
| <i>OTX1</i>         | Primary | Training | Sedimentation | 101 | 70  | Recurrent Ta-T2, grade 1-3 | Healthy                            | BS-SNaPshot  | 60 | 77 | 86 |  | 81 | 48 | 65 | Fixed=90% | 0.805     |       |    |      |      |          | 20<br>13 |
| <i>MEIS1</i>        | Primary | Training | Sedimentation | 101 | 70  | Recurrent Ta-T2, grade 1-3 | Healthy                            |              | 44 | 62 | 50 |  | 48 | 59 | 30 | 46        | Fixed=90% | 0.749 |    |      |      |          | 20<br>13 |
| <i>ONECUT2</i>      | Primary | Training | Sedimentation | 101 | 70  | Recurrent Ta-T2, grade 1-3 | Healthy                            |              | 49 | 77 | 50 |  | 46 | 70 | 43 | 52        | Fixed=90% | 0.737 |    |      |      |          | 20<br>13 |
| <i>SIM2</i>         | Primary | Training | Sedimentation | 101 | 70  | Recurrent Ta-T2, grade 1-3 | Healthy                            |              | 40 | 85 | 71 |  | 46 | 78 | 22 | 49        | Fixed=90% | 0.753 |    |      |      | [30]     | 20<br>13 |
| <i>FOXA1</i>        | Primary | Training | Sedimentation | 101 | 70  | Recurrent Ta-T2, grade 1-3 | Healthy                            |              | 33 | 62 | 43 |  | 43 | 59 | 4  | 38        | Fixed=90% | 0.659 |    |      |      |          | 20<br>13 |
| <i>ZNF503</i>       | Primary | Training | Sedimentation | 101 | 70  | Recurrent Ta-T2, grade 1-3 | Healthy                            |              | 47 | 77 | 64 |  | 50 | 70 | 35 | 52        | Fixed=90% | 0.784 |    |      |      |          | 20<br>13 |

|                                                                                                                                   |           |            |               |     |    |                                           |                          |                |    |    |    |    |    |    |       |           |       |               |
|-----------------------------------------------------------------------------------------------------------------------------------|-----------|------------|---------------|-----|----|-------------------------------------------|--------------------------|----------------|----|----|----|----|----|----|-------|-----------|-------|---------------|
| <i>HOXA9</i>                                                                                                                      | Primary   | Training   | Sedimentation | 101 | 70 | Recurrent Ta-T2, grade 1-3                | Healthy                  |                | 60 | 77 | 64 | 61 | 78 | 52 | 62    | Fixed=90% | 0.829 | 20<br>13      |
| <i>OSR1</i>                                                                                                                       | Primary   | Training   | Sedimentation | 101 | 70 | Recurrent Ta-T2, grade 1-3                | Healthy                  |                | 37 | 69 | 57 | 37 | 74 | 17 | 44    | Fixed=90% | 0.705 | 20<br>13      |
| <i>OTX1, ONECUT2, OSR1</i>                                                                                                        | Primary   | Training   | Sedimentation | 101 | 70 | Recurrent Ta-T2, grade 1-3                | Healthy                  |                | 64 | 77 | 86 | 65 | 81 | 57 | 68    | Fixed=90% | 0.801 | 20<br>13      |
| <i>OTX1, ONECUT2, OSR1</i>                                                                                                        | Recurrent | Validation | Sedimentation | 95  | 40 | Pre-tumor, NMIBC, grade 1-3, (recurrence) | No recurrence            |                |    |    |    |    |    |    | 74    | Fixed=90% | 0.864 | 20<br>13      |
| <i>SOX1</i>                                                                                                                       | Primary   |            | Sedimentation | 73  | 18 | T1-T4, grade 1-3                          | Healthy                  | Pyrosequencing |    |    |    |    |    |    | 41.54 | 100       | 0.74  | 20<br>13      |
| <i>TJP2</i>                                                                                                                       | Primary   |            | Sedimentation | 73  | 18 | T1-T4, grade 1-3                          | Healthy                  | Pyrosequencing |    |    |    |    |    |    | 92.54 | 56.25     | 0.79  | 20<br>13      |
| <i>MYOD</i>                                                                                                                       | Primary   |            | Sedimentation | 73  | 18 | T1-T4, grade 1-3                          | Healthy                  | Pyrosequencing |    |    |    |    |    |    | 86.79 | 87.50     | 0.93  | 20<br>13      |
| <i>HOXA9_1</i>                                                                                                                    | Primary   |            | Sedimentation | 73  | 18 | T1-T4, grade 1-3                          | Healthy                  | Pyrosequencing |    |    |    |    |    |    | 86.23 | 88.89     | 0.92  | 20<br>13      |
| <i>HOXA9_2</i>                                                                                                                    | Primary   |            | Sedimentation | 73  | 18 | T1-T4, grade 1-3                          | Healthy                  | Pyrosequencing |    |    |    |    |    |    | 88.57 | 61.54     | 0.81  | 20<br>13      |
| <i>VAMP8</i><br>(hypomethylated)                                                                                                  | Primary   |            | Sedimentation | 73  | 18 | T1-T4, grade 1-3                          | Healthy                  | Pyrosequencing |    |    |    |    |    |    | 97.06 | 40.0      | 0.72  | [10] 20<br>13 |
| <i>CASP8</i><br>(hypomethylated)                                                                                                  | Primary   |            | Sedimentation | 73  | 18 | T1-T4, grade 1-3                          | Healthy                  | Pyrosequencing |    |    |    |    |    |    | 73.61 | 76.92     | 0.82  | 20<br>13      |
| <i>SPP1</i><br>(hypomethylated)                                                                                                   | Primary   |            | Sedimentation | 73  | 18 | T1-T4, grade 1-3                          | Healthy                  | Pyrosequencing |    |    |    |    |    |    | 85.94 | 75.0      | 0.79  | 20<br>13      |
| <i>SOX1, TJP2, MYOD, HOXA9_1, HOXA9_2, VAMP8, CASP8, SPP1, IFNG, CAPG, HLADPA1, RIPK3</i> (positive when six or more are present) | Primary   |            | Sedimentation | 73  | 18 | Ta-T4, grade 1-3                          | Healthy                  | Pyrosequencing |    |    |    |    |    |    | 100   | 100       |       | 20<br>13      |
| <i>TWIST1</i>                                                                                                                     | Primary   |            | Sedimentation | 24  | 15 | Ta-T3, LG, HG                             | Mixed urologic diseases, | MSP            |    |    |    |    |    |    | 87.5  | 93.3      |       | [13] 20<br>13 |

|                     |         |          |               |    |    |               |                                      |         |  |      |      |      |      |      |      |       |      |          |
|---------------------|---------|----------|---------------|----|----|---------------|--------------------------------------|---------|--|------|------|------|------|------|------|-------|------|----------|
| <i>NID2</i>         | Primary |          | Sedimentation | 24 | 15 | Ta-T3, LG, HG | Mixed urologic diseases, and healthy | MSP     |  |      |      |      |      | 95.8 | 100  |       |      | 20<br>13 |
| <i>TWIST1, NID2</i> | Primary |          | Sedimentation | 24 | 15 | Ta-T3, LG, HG | Mixed urologic diseases, and healthy | MSP     |  |      |      |      |      | 95.8 | 93.3 |       |      | 20<br>13 |
| <i>PRDM2</i>        | Primary | Training | Sedimentation | 70 | 50 | ≥Ta, LG, HG   | Mixed urologic diseases, and healthy | MS-MLPA |  | 10.5 | 21.6 | 23.5 | 13.9 | 18.6 | 72   | 0.522 |      | 20<br>13 |
| <i>RUNX3</i>        | Primary | Training | Sedimentation | 70 | 50 | ≥Ta, LG, HG   | Mixed urologic diseases, and healthy | MS-MLPA |  | 31.6 | 29.4 | 32.3 | 27.8 | 30   | 86   | 0.613 |      | 20<br>13 |
| <i>RARB</i>         | Primary | Training | Sedimentation | 70 | 50 | ≥Ta, LG, HG   | Mixed urologic diseases, and healthy | MS-MLPA |  | 10.5 | 29.4 | 35.3 | 13.9 | 24.3 | 70   | 0.496 |      | 20<br>13 |
| <i>HLTF-1</i>       | Primary | Training | Sedimentation | 70 | 50 | ≥Ta, LG, HG   | Mixed urologic diseases, and healthy | MS-MLPA |  | 0.0  | 15.7 | 20.6 | 2.8  | 11.4 | 80   | 0.453 |      | 20<br>13 |
| <i>HLTF-2</i>       | Primary | Training | Sedimentation | 70 | 50 | ≥Ta, LG, HG   | Mixed urologic diseases, and healthy | MS-MLPA |  | 0.0  | 9.8  | 8.8  | 5.5  | 7.1  | 82   | 0.44  | [76] | 20<br>13 |
| <i>SCGB3A1-1</i>    | Primary | Training | Sedimentation | 70 | 50 | ≥Ta, LG, HG   | Mixed urologic diseases, and healthy | MS-MLPA |  | 21.0 | 35.3 | 41.2 | 22.2 | 31.4 | 68   | 0.526 |      | 20<br>13 |
| <i>SCGB3A1-2</i>    | Primary | Training | Sedimentation | 70 | 50 | ≥Ta, LG, HG   | Mixed urologic diseases, and healthy | MS-MLPA |  | 0.0  | 15.7 | 17.6 | 5.5  | 11.4 | 76   | 0.429 |      | 20<br>13 |
| <i>ID4-1</i>        | Primary | Training | Sedimentation | 70 | 50 | ≥Ta, LG, HG   | Mixed urologic diseases, and healthy | MS-MLPA |  | 10.5 | 37.2 | 38.2 | 22.2 | 30   | 82   | 0.609 |      | 20<br>13 |
| <i>ID4-2</i>        | Primary | Training | Sedimentation | 70 | 50 | ≥Ta, LG, HG   | Mixed urologic diseases, and healthy | MS-MLPA |  | 0.0  | 13.7 | 14.7 | 5.5  | 10   | 80   | 0.51  |      | 20<br>13 |



|                |         |          |               |    |    |             |                                      |         |      |      |      |      |      |    |       |      |
|----------------|---------|----------|---------------|----|----|-------------|--------------------------------------|---------|------|------|------|------|------|----|-------|------|
| <i>TWIST1</i>  | Primary | Training | Sedimentation | 70 | 50 | ≥Ta, LG, HG | Mixed urologic diseases, and healthy | MS-MLPA | 21.0 | 19.6 | 14.7 | 25.0 | 20   | 74 | 0.56  | 2013 |
| <i>SFRP4-1</i> | Primary | Training | Sedimentation | 70 | 50 | ≥Ta, LG, HG | Mixed urologic diseases, and healthy | MS-MLPA | 15.8 | 21.6 | 23.5 | 16.7 | 20   | 74 | 0.489 | 2013 |
| <i>SFRP4-2</i> | Primary | Training | Sedimentation | 70 | 50 | ≥Ta, LG, HG | Mixed urologic diseases, and healthy | MS-MLPA | 10.5 | 19.6 | 20.6 | 13.9 | 17.1 | 78 | 0.48  | 2013 |
| <i>DLC1-1</i>  | Primary | Training | Sedimentation | 70 | 50 | ≥Ta, LG, HG | Mixed urologic diseases, and healthy | MS-MLPA | 10.5 | 17.6 | 17.6 | 13.9 | 15.7 | 74 | 0.511 | 2013 |
| <i>DLC1-2</i>  | Primary | Training | Sedimentation | 70 | 50 | ≥Ta, LG, HG | Mixed urologic diseases, and healthy | MS-MLPA | 5.3  | 21.6 | 23.5 | 11.1 | 17.1 | 80 | 0.538 | 2013 |
| <i>SFRP5-1</i> | Primary | Training | Sedimentation | 70 | 50 | ≥Ta, LG, HG | Mixed urologic diseases, and healthy | MS-MLPA | 10.5 | 17.6 | 20.6 | 11.1 | 15.7 | 80 | 0.499 | 2013 |
| <i>SFRP5-2</i> | Primary | Training | Sedimentation | 70 | 50 | ≥Ta, LG, HG | Mixed urologic diseases, and healthy | MS-MLPA | 5.3  | 13.7 | 14.7 | 8.3  | 11.4 | 88 | 0.546 | 2013 |
| <i>BNIP3</i>   | Primary | Training | Sedimentation | 70 | 50 | ≥Ta, LG, HG | Mixed urologic diseases, and healthy | MS-MLPA | 15.8 | 33.3 | 35.3 | 22.2 | 28.6 | 70 | 0.506 | 2013 |
| <i>H2AFX-1</i> | Primary | Training | Sedimentation | 70 | 50 | ≥Ta, LG, HG | Mixed urologic diseases, and healthy | MS-MLPA | 5.3  | 19.6 | 26.5 | 5.5  | 15.7 | 84 | 0.551 | 2013 |
| <i>H2AFX-2</i> | Primary | Training | Sedimentation | 70 | 50 | ≥Ta, LG, HG | Mixed urologic diseases, and healthy | MS-MLPA | 0.0  | 11.8 | 14.7 | 2.8  | 8.6  | 90 | 0.548 | 2013 |
| <i>CCND2-1</i> | Primary | Training | Sedimentation | 70 | 50 | ≥Ta, LG, HG | Mixed urologic diseases, and healthy | MS-MLPA | 21.0 | 25.5 | 20.6 | 25.0 | 24.3 | 82 | 0.589 | 2013 |
| <i>CCND2-2</i> | Primary | Training | Sedimentation | 70 | 50 | ≥Ta, LG, HG | Mixed urologic                       | MS-MLPA | 31.6 | 43.1 | 47.1 | 33.3 | 40   | 66 | 0.568 | 2013 |

|                |         |            |               |     |    |             |                                      |         |      |      |      |      |      |      |       |    |    |
|----------------|---------|------------|---------------|-----|----|-------------|--------------------------------------|---------|------|------|------|------|------|------|-------|----|----|
|                |         |            |               |     |    |             | diseases, and healthy                |         |      |      |      |      |      |      |       |    |    |
| <i>CACNA1G</i> | Primary | Training   | Sedimentation | 70  | 50 | ≥Ta, LG, HG | Mixed urologic diseases, and healthy | MS-MLPA | 10.5 | 13.7 | 14.7 | 11.1 | 12.9 | 78   | 0.491 | 20 | 13 |
| <i>TGIF</i>    | Primary | Training   | Sedimentation | 70  | 50 | ≥Ta, LG, HG | Mixed urologic diseases, and healthy | MS-MLPA | 5.3  | 17.6 | 20.6 | 8.3  | 14.3 | 76   | 0.416 | 20 | 13 |
| <i>BCL2</i>    | Primary | Training   | Sedimentation | 70  | 50 | ≥Ta, LG, HG | Mixed urologic diseases, and healthy | MS-MLPA | 0.0  | 11.8 | 11.8 | 5.5  | 8.6  | 86   | 0.503 | 20 | 13 |
| <i>CACNA1A</i> | Primary | Training   | Sedimentation | 70  | 50 | ≥Ta, LG, HG | Mixed urologic diseases, and healthy | MS-MLPA | 46.1 | 15.7 | 14.7 | 13.9 | 14.3 | 82   | 0.562 | 20 | 13 |
| <i>TIMP3-1</i> | Primary | Training   | Sedimentation | 70  | 50 | ≥Ta, LG, HG | Mixed urologic diseases, and healthy | MS-MLPA | 5.3  | 11.8 | 14.7 | 5.5  | 10   | 84   | 0.511 | 20 | 13 |
| <i>TIMP3-2</i> | Primary | Training   | Sedimentation | 70  | 50 | ≥Ta, LG, HG | Mixed urologic diseases, and healthy | MS-MLPA | 10.5 | 13.7 | 14.7 | 11.1 | 12.9 | 80   | 0.481 | 20 | 13 |
| <i>PRDM2</i>   | Primary | Validation | Sedimentation | 100 | 28 | ≥Ta, LG, HG | Mixed urologic diseases, and healthy | MS-MLPA | 42.3 | 28.4 | 23.9 | 38.9 | 32   | 71.4 | 0.565 | 20 | 13 |
| <i>RUNX3</i>   | Primary | Validation | Sedimentation | 100 | 28 | ≥Ta, LG, HG | Mixed urologic diseases, and healthy | MS-MLPA | 46.1 | 33.8 | 26.1 | 46.3 | 37   | 82.1 | 0.655 | 20 | 13 |
| <i>RARB</i>    | Primary | Validation | Sedimentation | 100 | 28 | ≥Ta, LG, HG | Mixed urologic diseases, and healthy | MS-MLPA | 19.2 | 14.8 | 17.4 | 14.8 | 16   | 85.7 | 0.521 | 20 | 13 |
| <i>HLTF-1</i>  | Primary | Validation | Sedimentation | 100 | 28 | ≥Ta, LG, HG | Mixed urologic diseases, and healthy | MS-MLPA | 3.8  | 16.2 | 8.7  | 16.7 | 13   | 89.3 | 0.465 | 20 | 13 |
| <i>HLTF-2</i>  | Primary | Validation | Sedimentation | 100 | 28 | ≥Ta, LG, HG | Mixed urologic diseases,             | MS-MLPA | 7.7  | 12.2 | 4.3  | 16.7 | 11   | 92.9 | 0.511 | 20 | 13 |

|           |         |            |               |     |    |             |                                      |         |      |      |      |      |    |      |       |          |
|-----------|---------|------------|---------------|-----|----|-------------|--------------------------------------|---------|------|------|------|------|----|------|-------|----------|
| SCGB3A1-1 | Primary | Validation | Sedimentation | 100 | 28 | ≥Ta, LG, HG | Mixed urologic diseases, and healthy | MS-MLPA | 42.3 | 41.9 | 37   | 46.3 | 42 | 71.4 | 0.543 | 20<br>13 |
| SCGB3A1-2 | Primary | Validation | Sedimentation | 100 | 28 | ≥Ta, LG, HG | Mixed urologic diseases, and healthy | MS-MLPA | 19.2 | 10.8 | 10.9 | 14.8 | 13 | 92.9 | 0.533 | 20<br>13 |
| ID4-1     | Primary | Validation | Sedimentation | 100 | 28 | ≥Ta, LG, HG | Mixed urologic diseases, and healthy | MS-MLPA | 26.9 | 28.4 | 26.1 | 29.6 | 28 | 71.4 | 0.539 | 20<br>13 |
| ID4-2     | Primary | Validation | Sedimentation | 100 | 28 | ≥Ta, LG, HG | Mixed urologic diseases, and healthy | MS-MLPA | 3.8  | 21.6 | 19.6 | 14.8 | 17 | 82.1 | 0.535 | 20<br>13 |
| TWIST1    | Primary | Validation | Sedimentation | 100 | 28 | ≥Ta, LG, HG | Mixed urologic diseases, and healthy | MS-MLPA | 30.8 | 20.3 | 19.6 | 25.9 | 23 | 82.1 | 0.538 | 20<br>13 |
| SFRP4-1   | Primary | Validation | Sedimentation | 100 | 28 | ≥Ta, LG, HG | Mixed urologic diseases, and healthy | MS-MLPA | 3.8  | 14.9 | 15.2 | 9.3  | 12 | 89.3 | 0.532 | 20<br>13 |
| SFRP4-2   | Primary | Validation | Sedimentation | 100 | 28 | ≥Ta, LG, HG | Mixed urologic diseases, and healthy | MS-MLPA | 7.7  | 13.5 | 15.2 | 9.3  | 12 | 92.9 | 0.562 | 20<br>13 |
| DLC1-1    | Primary | Validation | Sedimentation | 100 | 28 | ≥Ta, LG, HG | Mixed urologic diseases, and healthy | MS-MLPA | 30.8 | 18.9 | 19.6 | 24.1 | 22 | 82.1 | 0.533 | 20<br>13 |
| DLC1-2    | Primary | Validation | Sedimentation | 100 | 28 | ≥Ta, LG, HG | Mixed urologic diseases, and healthy | MS-MLPA | 30.8 | 13.5 | 17.4 | 18.5 | 18 | 92.9 | 0.594 | 20<br>13 |
| SFRP5-1   | Primary | Validation | Sedimentation | 100 | 28 | ≥Ta, LG, HG | Mixed urologic diseases, and healthy | MS-MLPA | 23.1 | 17.6 | 13   | 24.1 | 19 | 92.9 | 0.578 | 20<br>13 |
| SFRP5-2   | Primary | Validation | Sedimentation | 100 | 28 | ≥Ta, LG, HG | Mixed urologic diseases, and healthy | MS-MLPA | 7.7  | 10.8 | 8.7  | 11.1 | 10 | 89.3 | 0.556 | 20<br>13 |

|                |         |            |               |     |    |             |                                      |         |      |      |      |      |    |      |       |          |
|----------------|---------|------------|---------------|-----|----|-------------|--------------------------------------|---------|------|------|------|------|----|------|-------|----------|
| <i>BNIP3</i>   | Primary | Validation | Sedimentation | 100 | 28 | ≥Ta, LG, HG | Mixed urologic diseases, and healthy | MS-MLPA | 34.6 | 41.9 | 37   | 42.6 | 40 | 57.1 | 0.532 | 20<br>13 |
| <i>H2AFX-1</i> | Primary | Validation | Sedimentation | 100 | 28 | ≥Ta, LG, HG | Mixed urologic diseases, and healthy | MS-MLPA | 11.5 | 21.6 | 19.6 | 18.5 | 19 | 78.6 | 0.469 | 20<br>13 |
| <i>H2AFX-2</i> | Primary | Validation | Sedimentation | 100 | 28 | ≥Ta, LG, HG | Mixed urologic diseases, and healthy | MS-MLPA | 0    | 10.8 | 10.9 | 5.5  | 8  | 96.4 | 0.493 | 20<br>13 |
| <i>CCND2-1</i> | Primary | Validation | Sedimentation | 100 | 28 | ≥Ta, LG, HG | Mixed urologic diseases, and healthy | MS-MLPA | 15.4 | 27   | 19.6 | 27.8 | 24 | 92.9 | 0.598 | 20<br>13 |
| <i>CCND2-2</i> | Primary | Validation | Sedimentation | 100 | 28 | ≥Ta, LG, HG | Mixed urologic diseases, and healthy | MS-MLPA | 46.1 | 47.3 | 43.5 | 50   | 47 | 64.3 | 0.544 | 20<br>13 |
| <i>CACNA1G</i> | Primary | Validation | Sedimentation | 100 | 28 | ≥Ta, LG, HG | Mixed urologic diseases, and healthy | MS-MLPA | 7.7  | 20.3 | 13   | 20.4 | 17 | 92.9 | 0.608 | 20<br>13 |
| <i>TGIF</i>    | Primary | Validation | Sedimentation | 100 | 28 | ≥Ta, LG, HG | Mixed urologic diseases, and healthy | MS-MLPA | 11.5 | 5.4  | 6.5  | 7.4  | 7  | 85.7 | 0.48  | 20<br>13 |
| <i>BCL2</i>    | Primary | Validation | Sedimentation | 100 | 28 | ≥Ta, LG, HG | Mixed urologic diseases, and healthy | MS-MLPA | 3.8  | 12.2 | 8.7  | 11.1 | 10 | 89.3 | 0.508 | 20<br>13 |
| <i>CACNA1A</i> | Primary | Validation | Sedimentation | 100 | 28 | ≥Ta, LG, HG | Mixed urologic diseases, and healthy | MS-MLPA | 7.7  | 18.9 | 17.4 | 14.8 | 16 | 92.9 | 0.63  | 20<br>13 |
| <i>TIMP3-1</i> | Primary | Validation | Sedimentation | 100 | 28 | ≥Ta, LG, HG | Mixed urologic diseases, and healthy | MS-MLPA | 3.8  | 14.9 | 13   | 11.1 | 12 | 92.9 | 0.546 | 20<br>13 |
| <i>TIMP3-2</i> | Primary | Validation | Sedimentation | 100 | 28 | ≥Ta, LG, HG | Mixed urologic diseases, and healthy | MS-MLPA | 0    | 14.9 | 13   | 9.3  | 11 | 89.3 | 0.544 | 20<br>13 |

|                                  |           |               |                 |    |                  |                                      |            |      |      |      |     |              |              |                            |       |       |      |           |
|----------------------------------|-----------|---------------|-----------------|----|------------------|--------------------------------------|------------|------|------|------|-----|--------------|--------------|----------------------------|-------|-------|------|-----------|
| Panel consisting of 41 sequences | Recurrent | Sedimentation | 136 G1/G2 NMIBC |    | ≥Ta, LG, HG      | Mixed urologic diseases, and healthy | MS-MLPA    | 68   | 89   | 50   |     | 74 (grade 2) | 82 (grade 3) | 57 (grade 1), 20 (grade 0) |       |       | [31] | 2013      |
| <i>BCL2, CDKN2A, NID2</i>        | Primary   | Sedimentation | 42              | 22 | Ta-T3, LG, HG    | Mixed urologic diseases, and healthy | nested MSP | 61.1 | 92.3 | 100  |     | 83           | 94.4         | 54.5                       | 80.95 | 86.36 |      | 2012      |
| <i>BCL2</i>                      | Primary   | Sedimentation | 42              | 22 | Ta-T3, LG, HG    | Mixed urologic diseases, and healthy | nested MSP | 38.8 | 69.2 | 100  |     | 66.7         | 83.3         | 27.3                       | 61.90 | 100   |      | 2012      |
| <i>CDKN2A</i>                    | Primary   | Sedimentation | 42              | 22 | Ta-T3, LG, HG    | Mixed urologic diseases, and healthy | nested MSP | 11.1 | 7.7  | 0    |     | 0            | 5.6          | 18                         | 7.14  | 95.45 | [77] | 2012      |
| <i>NID2</i>                      | Primary   | Sedimentation | 42              | 22 | Ta-T3, LG, HG    | Mixed urologic diseases, and healthy | nested MSP | 38.8 | 76.9 | 88.9 |     | 66.7         | 77.8         | 27.3                       | 61.90 | 90.91 |      | 2012      |
| <i>EOMES</i>                     | Primary   | Sedimentation | 184             | 35 | Ta-T1, grade 1-3 | Mixed urologic diseases              | qMSP       | 86   | 100  | 92   |     | 85           | 95           | 65                         | 88    | 97    | 0.96 | 2012      |
| <i>HOXA9</i>                     | Primary   | Sedimentation | 184             | 35 | Ta-T1, grade 1-3 | Mixed urologic diseases              | qMSP       | 80   | 50   | 87   |     | 80           | 83           | 80                         | 82    | 100   | 0.91 | 2012      |
| <i>POU4F2</i>                    | Primary   | Sedimentation | 184             | 35 | Ta-T1, grade 1-3 | Mixed urologic diseases              | qMSP       | 83   | 100  | 88   |     | 82           | 91           | 59                         | 85    | 94    | 0.94 | 2012      |
| <i>TWIST1</i>                    | Primary   | Sedimentation | 184             | 35 | Ta-T1, grade 1-3 | Mixed urologic diseases              | qMSP       | 85   | 100  | 96   |     | 90           | 89           | 71                         | 88    | 100   | 0.94 | 2012      |
| <i>VIM</i>                       | Primary   | Sedimentation | 184             | 35 | Ta-T1, grade 1-3 | Mixed urologic diseases              | qMSP       | 89   | 100  | 88   |     | 86           | 94           | 75                         | 89    | 100   | 0.97 | 2012      |
| <i>ZNF154</i>                    | Primary   | Sedimentation | 184             | 35 | Ta-T1, grade 1-3 | Mixed urologic diseases              | qMSP       | 84   | 100  | 94   |     | 77           | 98           | 71                         | 87    | 100   | 0.95 | [25] 2012 |
| <i>EOMES</i>                     | Recurrent | Sedimentation | 139             | 67 | Ta-T1, grade 1-3 | Mixed urologic diseases              | qMSP       | 91   | 100  | 96   | 100 | 96           | 92           | 88                         | 94    | 55    | 0.85 | 2012      |
| <i>HOXA9</i>                     | Recurrent | Sedimentation | 139             | 67 | Ta-T1, grade 1-3 | Mixed urologic diseases              | qMSP       | 93   | 100  | 92   | 90  | 93           | 92           | 91                         | 93    | 55    | 0.78 | 2012      |
| <i>POU4F2</i>                    | Recurrent | Sedimentation | 139             | 67 | Ta-T1, grade 1-3 | Mixed urologic diseases              | qMSP       | 85   | 67   | 93   | 90  | 89           | 85           | 81                         | 88    | 64    | 0.80 | 2012      |
| <i>TWIST1</i>                    | Recurrent | Sedimentation | 139             | 67 | Ta-T1, grade 1-3 | Mixed urologic diseases              | qMSP       | 87   | 75   | 93   | 100 | 88           | 91           | 82                         | 90    | 43    | 0.76 | 2012      |

|                                       |                       |            |               |     |        |                      |                           |      |    |     |    |    |    |    |     |       |             |           |               |
|---------------------------------------|-----------------------|------------|---------------|-----|--------|----------------------|---------------------------|------|----|-----|----|----|----|----|-----|-------|-------------|-----------|---------------|
| <i>VIM</i>                            | Recurrent             |            | Sedimentation | 139 | 67     | Ta-T1, grade 1-3     | Mixed urologic diseases   | qMSP | 89 | 75  | 93 | 92 | 92 | 88 | 89  | 90    | 59          | 0.78      | 20<br>12      |
| <i>ZNF154</i>                         | Recurrent             |            | Sedimentation | 139 | 67     | Ta-T1, grade 1-3     | Mixed urologic diseases   | qMSP | 95 | 100 | 93 | 83 | 94 | 92 | 100 | 94    | 67          | 0.83      | 20<br>12      |
| <i>TWIST1</i>                         | Primary               | Training   | Sedimentation | 48  | 275    | Not specified        | Hematuria                 | qMSP |    |     |    |    |    |    |     | 84    |             |           | 20<br>12      |
| <i>NID2</i>                           | Primary               | Training   | Sedimentation | 48  | 275    | Not specified        | Hematuria                 | qMSP |    |     |    |    |    |    |     | 33    |             |           | [78] 20<br>12 |
| <i>VAX1</i>                           | Primary and Recurrent | Validation | Sedimentation | 212 | 149/41 | Stage 1-4, grade 1-3 | Normal/Urological Lesions | MSP  |    |     |    |    |    |    |     | 42.45 | 95.31/87.81 | 73.3/59.5 | 20<br>12      |
| <i>KCNV1</i>                          | Primary and Recurrent | Validation | Sedimentation | 212 | 149/41 | Stage 1-4, grade 1-3 | Normal/Urological Lesions | MSP  |    |     |    |    |    |    |     | 36.92 | 93.96/95.12 | 71.3/60.5 | 20<br>12      |
| <i>ECEL1</i>                          | Primary and Recurrent | Validation | Sedimentation | 212 | 149/41 | Stage 1-4, grade 1-3 | Normal/Urological Lesions | MSP  |    |     |    |    |    |    |     | 26.89 | 97.31/97.56 | 70.8/59.3 | 20<br>12      |
| <i>TMEM26</i>                         | Primary and Recurrent | Validation | Sedimentation | 212 | 149/41 | Stage 1-4, grade 1-3 | Normal/Urological Lesions | MSP  |    |     |    |    |    |    |     | 26.42 | 96.64/97.56 | 69.4/60.3 | 20<br>12      |
| <i>PROX1</i>                          | Primary and Recurrent | Validation | Sedimentation | 212 | 149/41 | Stage 1-4, grade 1-3 | Normal/Urological Lesions | MSP  |    |     |    |    |    |    |     | 24.53 | 98.66/100.0 | 71.1/59.1 | 20<br>12      |
| <i>TAL1</i>                           | Primary and Recurrent | Validation | Sedimentation | 212 | 149/41 | Stage 1-4, grade 1-3 | Normal/Urological Lesions | MSP  |    |     |    |    |    |    |     | 24.83 | 98.66/100.0 | 72.5/60.4 | [79] 20<br>12 |
| <i>SLC6A20</i>                        | Primary and Recurrent | Validation | Sedimentation | 212 | 149/41 | Stage 1-4, grade 1-3 | Normal/Urological Lesions | MSP  |    |     |    |    |    |    |     | 15.57 | 97.89/100.0 | 69.7/59.3 | 20<br>12      |
| <i>LMX1</i>                           | Primary and Recurrent | Validation | Sedimentation | 212 | 149/41 | Stage 1-4, grade 1-3 | Normal/Urological Lesions | MSP  |    |     |    |    |    |    |     | 9.43  | 98.66/100.0 | 67.1/58.8 | 20<br>12      |
| <i>CFTR</i>                           | Primary               | Validation | Sedimentation | 212 | 149/41 | Stage 1-4, grade 1-3 | Normal/Urological Lesions | MSP  |    |     |    |    |    |    |     | 52.35 | 96.64/97.56 | 77.4/63.8 | 20<br>12      |
| <i>VAX1, KCNV1, TAL1, PPOX1</i>       | Primary               | Validation | Sedimentation | 212 | 149/41 | Stage 1-4, grade 1-3 | Normal/Urological Lesions | MSP  |    |     |    |    |    |    |     | 76.89 | 88.59/85.36 | 82.8/84.3 | 20<br>12      |
| <i>CFTR, VAX1, KCNV1, TAL1, PPOX1</i> | Primary               | Validation | Sedimentation | 212 | 149/41 | Stage 1-4, grade 1-3 | Normal/Urological Lesions | MSP  |    |     |    |    |    |    |     | 88.68 | 87.25/90.0  | 89.9/90.0 | 20<br>12      |

|                                     |           |               |     |     |                      |                   |                                   |                |                |                      |                   |               |                 |               |      |      |      |      |
|-------------------------------------|-----------|---------------|-----|-----|----------------------|-------------------|-----------------------------------|----------------|----------------|----------------------|-------------------|---------------|-----------------|---------------|------|------|------|------|
| <i>RAR-β2</i>                       | Primary   | Sedimentation | 100 | 51  | Stage 1-4, LG, HG    | Not Specified     | Methylated on specific nested PCR |                |                | 77.8 (stage III,I V) | 62.2 (stage I,II) | 59.2          | 83.3            | 65            | 69.7 | [80] | 2012 |      |
| <i>TWIST1</i>                       | Recurrent |               | 48  | 275 | Ta-T3, grade 1-3     | No recurrence     | MSP                               |                |                |                      |                   |               |                 | 75            | 69   | [26] | 2012 |      |
| <i>NID2</i>                         | Recurrent |               | 48  | 275 | Ta-T3, grade 1-3     | No recurrence     | MSP                               |                |                |                      |                   |               |                 | 46            | 90   |      | 2012 |      |
| <i>PCDH17, TCF21</i>                | Primary   | Sedimentation | 50  | 48  | Ta-T4, HG, LG        | Healthy           | qMSP                              |                |                |                      |                   |               |                 | 60            | 100  |      | 2011 |      |
| <i>PCDH17</i>                       | Primary   | Sedimentation | 50  | 48  | Ta-T4, HG, LG        | Healthy           | qMSP                              |                |                |                      |                   |               |                 | 50            | 100  | [39] | 2011 |      |
| <i>TCF21</i>                        | Primary   | Sedimentation | 50  | 48  | Ta-T4, HG, LG        | Healthy           | qMSP                              |                |                |                      |                   |               |                 | 52            | 100  |      | 2011 |      |
| <i>ZNF154</i>                       | Primary   | Sedimentation | 110 | 57  | Ta-T4, grade 1-4     | Not specified     | MS-HRM                            | 84             | 100            | 100                  |                   | 95 (grade 2)  | 97 (grade 3-4)  | 67 (grade 1)  | 62   | 100  | 0.84 | 2011 |
| <i>POU4F2</i>                       | Primary   | Sedimentation | 113 | 54  | Ta-T4, grade 1-4     | Not specified     | MS-HRM                            | 92             | 100            | 100                  |                   | 95 (grade 2)  | 97 (grade 3-4)  | 100 (grade 1) | 66   | 100  | 0.88 | 2011 |
| <i>HOXA9</i>                        | Primary   | Sedimentation | 107 | 48  | Ta-T4, grade 1-4     | Not specified     | MS-HRM                            | 83             | 100            | 87                   |                   | 88 (grade 2)  | 90 (grade 3-4)  | 100 (grade 1) | 74   | 96   | 0.84 | 2011 |
| <i>EOMES</i>                        | Primary   | Sedimentation | 101 | 40  | Ta-T4, grade 1-4     | Not specified     | MS-HRM                            | 68             | 93             | 87                   |                   | 79 (grade 2)  | 86 (grade 3-4)  | 50 (grade 1)  | 68   | 100  | 0.89 | 2011 |
| <i>CA3</i>                          | Primary   | Sedimentation |     |     | Ta-T4, grade 1-4     | Not specified     | MS-HRM                            | 92             | 100            | 100                  |                   | 100 (grade 2) | 100 (grade 3-4) | 67 (grade 1)  |      |      | [81] | 2011 |
| <i>PCDHGA12</i>                     | Primary   | Sedimentation |     |     | Ta-T4, grade 1-4     | Not specified     | MS-HRM                            | 92             | 93             | 100                  |                   | 95 (grade 2)  | 97 (grade 3-4)  | 83 (grade 1)  |      |      |      | 2011 |
| <i>ACOT11</i>                       | Primary   | Sedimentation |     |     | Ta-T4, grade 1-4     | Not specified     | MS-HRM                            | 79             | 100            | 100                  |                   | 78 (grade 2)  | 97 (grade 3-4)  | 100 (grade 1) |      |      |      | 2011 |
| <i>PTGDR</i>                        | Primary   | Sedimentation |     |     | Ta-T4, grade 1-4     | Not specified     | MS-HRM                            | 44             | 80             | 67                   |                   | 58 (grade 2)  | 69 (grade 3-4)  | 33 (grade 1)  |      |      |      | 2011 |
| <i>ZNF154, POU4F2, HOXA9, EOMES</i> | Primary   | Sedimentation | 112 | 52  | Ta-T4, grade 1-4     | Not specified     | MS-HRM                            |                |                |                      |                   |               |                 | 84            | 96   | 0.90 | 2011 |      |
| <i>RARβ2</i>                        | Primary   | Sedimentation | 210 | 110 | Stage 1-4, grade 1-3 | Healthy/benign BC | MSP                               | 70 (stage 1)   | 52.2 (stage 2) | 53.3 (stage 3)       | 69.4 (stage 4)    | 58.2          | 52.6            | 83.7          | 62.8 | 87.9 | [82] | 2011 |
| <i>APC</i>                          | Primary   | Sedimentation | 210 | 110 | Stage 1-4, grade 1-3 | Healthy/benign BC | MSP                               | 58.4 (stage 1) | 64.2 (stage 2) | 73.3 (stage 3)       | 41.7 (stage 4)    | 59.1          | 63.2            | 55.8          | 59.5 | 98   |      | 2011 |

|                         |                   |               |     |     |                      |                                           |      |                |                  |      |      |       |      |
|-------------------------|-------------------|---------------|-----|-----|----------------------|-------------------------------------------|------|----------------|------------------|------|------|-------|------|
| <i>RARb2, APC</i>       | Primary           | Sedimentation | 210 | 110 | Stage 1-4, grade 1-3 | Healthy/benign BC                         | MSP  |                |                  | 87.3 | 97.6 |       | 2011 |
| <i>DAPK</i>             | Primary/Recurrent | Sedimentation | 30  | 19  | ≥Ta, grade 1-3       | Noncancer controls, not further specified | qMSP | 25.0 (grade 1) | 27.7 (grade 2-3) | 26.7 | 89.5 |       | 2011 |
| <i>IRF8</i>             | Primary/Recurrent | Sedimentation | 30  | 19  | ≥Ta, grade 1-3       | Noncancer controls, not further specified | qMSP | 50.0 (grade 1) | 61.1 (grade 2-3) | 56.7 | 94.7 |       | 2011 |
| <i>p14</i>              | Primary/Recurrent | Sedimentation | 30  | 19  | ≥Ta, grade 1-3       | Noncancer controls, not further specified | qMSP | 41.7 (grade 1) | 16.7 (grade 2-3) | 27.6 | 100  |       | 2011 |
| <i>RASSF1A</i>          | Primary/Recurrent | Sedimentation | 30  | 19  | ≥Ta, grade 1-3       | Noncancer controls, not further specified | qMSP | 16.7 (grade 1) | 38.9 (grade 2-3) | 30.0 | 89   |       | 2011 |
| <i>SFRP1</i>            | Primary/Recurrent | Sedimentation | 30  | 19  | ≥Ta, grade 1-3       | Noncancer controls, not further specified | qMSP | 50.0 (grade 1) | 33.4 (grade 2-3) | 41.4 | 100  |       | 2011 |
| <i>IRF8, p14, SFRP1</i> | Primary/Recurrent | Sedimentation | 30  | 19  | ≥Ta, grade 1-3       | Noncancer controls, not further specified | qMSP | 91.7 (grade 1) | 83.3 (grade 2-3) | 86.7 | 94.7 |       | 2011 |
| <i>MYO3A</i>            | Primary           | Sedimentation | 128 | 110 | Ta-T4, grade 1-4     | Benign urological disorders, healthy      | qMSP |                |                  | 77.3 | 90.9 | 0.841 | 2011 |
| <i>CA10</i>             | Primary           | Sedimentation | 128 | 110 | Ta-T4, grade 1-4     | Benign urological disorders, healthy      | qMSP |                |                  | 85.2 | 81.8 | 0.835 | 2011 |
| <i>NKX6-2</i>           | Primary           | Sedimentation | 128 | 110 | Ta-T4, grade 1-4     | Benign urological disorders, healthy      | qMSP |                |                  | 88.3 | 76.4 | 0.823 | 2011 |
| <i>PENK</i>             | Primary           | Sedimentation | 128 | 110 | Ta-T4, grade 1-4     | Benign urological disorders, healthy      | qMSP |                |                  | 81.3 | 79.1 | 0.802 | 2011 |
| <i>SOX11</i>            | Primary           | Sedimentation | 128 | 110 | Ta-T4, grade 1-4     | Benign urological disorders, healthy      | qMSP |                |                  | 70.3 | 89.1 | 0.797 | 2011 |
| <i>DBC1</i>             | Primary           | Sedimentation | 128 | 110 | Ta-T4, grade 1-4     | Benign urological                         | qMSP |                |                  | 71.1 | 83.6 | 0.774 | 2011 |

[83]

[84]



|                                                                          |         |               |     |     |                        |                                               |      |      |       |       |      |          |
|--------------------------------------------------------------------------|---------|---------------|-----|-----|------------------------|-----------------------------------------------|------|------|-------|-------|------|----------|
|                                                                          |         |               |     |     |                        | disorders,<br>healthy                         |      |      |       |       |      |          |
| <i>NPTX2</i>                                                             | Primary | Sedimentation | 128 | 110 | Ta-T4,<br>grade<br>1-4 | Benign<br>urological<br>disorders,<br>healthy | qMSP | 75.8 | 73.6  | 0.747 |      | 20<br>11 |
| <i>A2BP1</i>                                                             | Primary | Sedimentation | 128 | 110 | Ta-T4,<br>grade<br>1-4 | Benign<br>urological<br>disorders,<br>healthy | qMSP | 87.5 | 54.5  | 0.710 |      | 20<br>11 |
| <i>MYO3A, CA10,<br/>NKX6-2, DBC1,<br/>SOX11</i>                          | Primary | Sedimentation | 128 | 110 | Ta-T4,<br>grade<br>1-4 | Benign<br>urological<br>disorders,<br>healthy | qMSP | 85.2 | 94.5  | 0.939 |      | 20<br>11 |
| <i>MYO3A, CA10,<br/>NKX6-2, DBC1,<br/>PENK</i>                           | Primary | Sedimentation | 128 | 110 | Ta-T4,<br>grade<br>1-4 | Benign<br>urological<br>disorders,<br>healthy | qMSP | 85.2 | 94.5  | 0.939 |      | 20<br>11 |
| <i>MYO3A, CA10,<br/>NKX6-2, SOX11</i>                                    | Primary | Sedimentation | 128 | 110 | Ta-T4,<br>grade<br>1-4 | Benign<br>urological<br>disorders,<br>healthy | qMSP | 81.3 | 97.3  | 0.939 |      | 20<br>11 |
| <i>MYO3A, CA10,<br/>NKX6-2, DBC1</i>                                     | Primary | Sedimentation | 128 | 110 | Ta-T4,<br>grade<br>1-4 | Benign<br>urological<br>disorders,<br>healthy | qMSP | 81.3 | 97.3  | 0.939 |      | 20<br>11 |
| <i>GDF15</i>                                                             | Primary | Sedimentation | 51  | 20  | Not<br>specific<br>d   | Healthy                                       | qMSP | 47.1 | 100   |       |      | 20<br>10 |
| <i>HSPA2</i>                                                             | Primary | Sedimentation | 51  | 20  | Not<br>specific<br>d   | Healthy                                       | qMSP | 58.8 | 100   |       |      | 20<br>10 |
| <i>TMEFF2</i>                                                            | Primary | Sedimentation | 51  | 20  | Not<br>specific<br>d   | Healthy                                       | qMSP | 62.8 | 100   |       |      | 20<br>10 |
| <i>VIM</i>                                                               | Primary | Sedimentation | 51  | 20  | Not<br>specific<br>d   | Healthy                                       | qMSP | 78.4 | 100   |       | [16] | 20<br>10 |
| <i>VIM, TMEFF2</i>                                                       | Primary | Sedimentation | 51  | 20  | Not<br>specific<br>d   | Healthy                                       | qMSP | 82   | 100   |       |      | 20<br>10 |
| <i>VIM, TMEFF2,<br/>GDF15</i>                                            | Primary | Sedimentation | 51  | 20  | Not<br>specific<br>d   | Healthy                                       | qMSP | 94   | 100   |       |      | 20<br>10 |
| <i>VIM, TMEFF2,<br/>GDF15, HSPA2</i>                                     | Primary | Sedimentation | 51  | 20  | Not<br>specific<br>d   | Healthy                                       | qMSP | 94   | 100   |       |      | 20<br>10 |
| <i>APC, RARB,<br/>RASSF1A, SFRP1,<br/>SFRP54, SFRP5,<br/>DBC1, SFRP2</i> | Primary | Sedimentation | 113 | 33  | Ta-T3,<br>grade<br>0-4 | Mixed<br>genitourin<br>ary<br>disorders       | qMSP | 52   | 100   |       | [85] | 20<br>11 |
| <i>SFRP1</i>                                                             | Primary | Sedimentation | 82  | 15  | Stage<br>pTa-IV        | Mixed<br>urologic<br>diseases                 | MSP  | 36.6 | 93,33 |       | [18] | 20<br>09 |

|                                                                                  |         |               |     |     |               |                                  |      |    |    |    |    |    |      |       |      |
|----------------------------------------------------------------------------------|---------|---------------|-----|-----|---------------|----------------------------------|------|----|----|----|----|----|------|-------|------|
| <i>FANCF</i>                                                                     | Primary | Sedimentation | 82  | 15  | Stage pTa-IV  | Mixed urologic diseases          | MSP  |    |    |    |    |    | 13.4 | 100   | 2009 |
| <i>LOXL1</i>                                                                     | Primary | Sedimentation | 82  | 15  | Stage pTa-IV  | Mixed urologic diseases          | MSP  |    |    |    |    |    | 40.2 | 73,33 | 2009 |
| <i>p16INK4</i>                                                                   | Primary | Sedimentation | 82  | 15  | Stage pTa-IV  | Mixed urologic diseases          | MSP  |    |    |    |    |    | 22   | 86,67 | 2009 |
| <i>XAF1</i>                                                                      | Primary | Sedimentation | 82  | 15  | Stage pTa-IV  | Mixed urologic diseases          | MSP  |    |    |    |    |    | 70.7 | 33,33 | 2009 |
| <i>CDH1</i>                                                                      | Primary | Sedimentation | 82  | 15  | Stage pTa-IV  | Mixed urologic diseases          | MSP  |    |    |    |    |    | 22   | 80,00 | 2009 |
| <i>LOXL4</i>                                                                     | Primary | Sedimentation | 82  | 15  | Stage pTa-IV  | Mixed urologic diseases          | MSP  |    |    |    |    |    | 11   | /86.7 | 2009 |
| <i>TIMP3</i>                                                                     | Primary | Sedimentation | 82  | 15  | Stage pTa-IV  | Mixed urologic diseases          | MSP  |    |    |    |    |    | 8.5  | /86.7 | 2009 |
| <i>TIG1</i>                                                                      | Primary | Sedimentation | 82  | 15  | Stage pTa-IV  | Mixed urologic diseases          | MSP  |    |    |    |    |    | 3.7  | 93,33 | 2009 |
| <i>SOX9</i>                                                                      | Primary | Sedimentation | 82  | 15  | Stage pTa-IV  | Mixed urologic diseases          | MSP  |    |    |    |    |    | 3.7  | 86,67 | 2009 |
| <i>SALL3</i>                                                                     | Primary | Sedimentation | 82  | 15  | Stage pTa-IV  | Mixed urologic diseases          | MSP  |    |    |    |    |    | 58   | 100   | 2009 |
| <i>SALL3, CFTR, MT1A, HPP1, ABCC6, RASSF1A, CDH13, RPRM, MINT1, BRCA1</i>        | Primary | Sedimentation | 82  | 15  | Stage pTa-IV  | Mixed urologic diseases          | MSP  |    |    |    |    |    | 90.2 | 80.0  | 2009 |
| <i>SALL3, CFTR, MT1A, HPP1, ABCC6, RASSF1A, CDH13, RPRM, MINT1, BRCA1, SFRP1</i> | Primary | Sedimentation | 82  | 15  | Stage pTa-IV  | Mixed urologic diseases          | MSP  |    |    |    |    |    | 91.5 | 73.3  | 2009 |
| <i>BCL2</i>                                                                      | Primary | Sedimentation | 108 | 105 | Ta-T1, LG, HG | Mixed urologic diseases, Healthy | qMSP | 66 | 0  | 65 | 57 | 37 | 64.8 | 97.1  | 2011 |
| <i>hTERT</i>                                                                     | Primary | Sedimentation | 108 | 105 | Ta-T1, LG, HG | Mixed urologic diseases, Healthy | qMSP | 66 | 50 | 38 | 23 | 70 | 41.7 | 99.1  | 2011 |
| <i>DAPK</i>                                                                      | Primary | Sedimentation | 108 | 105 | Ta-T1, LG, HG | Mixed urologic diseases, Healthy | qMSP | 27 | 0  | 20 | 23 | 28 | 25   | 90.5  | 2011 |
| <i>BCL2, hTERT, DAPK</i>                                                         | Primary | Sedimentation | 108 | 105 | Ta-T1, LG, HG | Mixed urologic diseases, Healthy | qMSP | 79 | 50 | 80 | 71 | 91 | 78.7 | 89.5  | 2011 |

|                                                                                 |           |               |     |      |               |                                 |      |      |       |       |       |    |    |    |      |         |           |           |
|---------------------------------------------------------------------------------|-----------|---------------|-----|------|---------------|---------------------------------|------|------|-------|-------|-------|----|----|----|------|---------|-----------|-----------|
| <i>E-cad</i>                                                                    | Primary   | Sedimentation | 57  | 20   | Ta-T4, LG, HG | Healthy                         | MSP  |      |       |       | 32    | 38 | 42 | 32 | 35   | NA      | 2010      |           |
| <i>p16</i>                                                                      | Primary   | Sedimentation | 57  | 20   | Ta-T4, LG, HG | Healthy                         | MSP  |      |       |       | 36    | 34 | 37 | 34 | 35   |         | 2010      |           |
| <i>p14</i>                                                                      | Primary   | Sedimentation | 57  | 20   | Ta-T4, LG, HG | Healthy                         | MSP  |      |       |       | 24    | 41 | 42 | 29 | 33   |         | 2010      |           |
| <i>RASSF1A</i>                                                                  | Primary   | Sedimentation | 57  | 20   | Ta-T4, LG, HG | Healthy                         | MSP  |      |       |       | 64    | 66 | 63 | 66 | 65   |         | [87] 2010 |           |
| <i>p14, RASSF1A</i>                                                             | Primary   | Sedimentation | 57  | 20   | Ta-T4, LG, HG | Healthy                         | MSP  |      |       |       |       |    |    |    | 75   |         | 2010      |           |
| <i>E-cad, p14, RASSF1A</i>                                                      | Primary   | Sedimentation | 57  | 20   | Ta-T4, LG, HG | Healthy                         | MSP  |      |       |       | 75    | 85 | 85 | 79 | 83   |         | 2010      |           |
| <i>RASSF1A</i>                                                                  | Recurrent | Sedimentation | 15  | 25   | Ta-T1         | No recurrence                   | qMSP |      |       |       |       |    |    |    | 50   | 32      | 2008      |           |
| <i>ECAD</i>                                                                     | Recurrent | Sedimentation | 15  | 25   | Ta-T1         | No recurrence                   | qMSP |      |       |       |       |    |    |    | 7    | 84      | 2008      |           |
| <i>APC</i>                                                                      | Recurrent | Sedimentation | 15  | 25   | Ta-T1         | No recurrence                   | qMSP |      |       |       |       |    |    |    | 27   | 80      | 2008      |           |
| <i>DAPK</i>                                                                     | Recurrent | Sedimentation | 15  | 25   | Ta-T1         | No recurrence                   | qMSP |      |       |       |       |    |    |    | 0    | 96      | 2008      |           |
| <i>MGMT</i>                                                                     | Recurrent | Sedimentation | 15  | 25   | Ta-T1         | No recurrence                   | qMSP |      |       |       |       |    |    |    | 20   | 92      | 2008      |           |
| <i>BCL2</i>                                                                     | Recurrent | Sedimentation | 15  | 25   | Ta-T1         | No recurrence                   | qMSP |      |       |       |       |    |    |    | 13   | 96      | 2008      |           |
| <i>TERT</i>                                                                     | Recurrent | Sedimentation | 15  | 25   | Ta-T1         | No recurrence                   | qMSP |      |       |       |       |    |    |    | 13   | 100     | [24] 2008 |           |
| <i>EDNRB</i>                                                                    | Recurrent | Sedimentation | 15  | 25   | Ta-T1         | No recurrence                   | qMSP |      |       |       |       |    |    |    | 20   | 80      | 2008      |           |
| <i>WIF1</i>                                                                     | Recurrent | Sedimentation | 15  | 25   | Ta-T1         | No recurrence                   | qMSP |      |       |       |       |    |    |    | 20   | 76      | 2008      |           |
| <i>TNFRSF25</i>                                                                 | Recurrent | Sedimentation | 15  | 25   | Ta-T1         | No recurrence                   | qMSP |      |       |       |       |    |    |    | 40   | 56      | 2008      |           |
| <i>IGFBP</i>                                                                    | Recurrent | Sedimentation | 15  | 25   | Ta-T1         | No recurrence                   | qMSP |      |       |       |       |    |    |    | 20   | 84      | 2008      |           |
| <i>RASSF1A, ECAD, APC, DAPK, MGMT, BCL2, TERT, EDNRB, WIF1, TNFRSF25, IGFBP</i> | Recurrent | Sedimentation | 15  | 25   | Ta-T1         | No recurrence                   | qMSP |      |       |       |       |    |    |    | 86   | 8       | 0.448     | 2008      |
| <i>SALL3, CFTR, ABCC6, HPR1, RASSF1A, MT1A, ALX4, CDH13, RPRM, MINT1, BRCA1</i> | Primary   | Sedimentation | 132 | 23/7 | Stage 0a-IV   | Mixed urologic diseases/healthy | MSP  |      |       |       |       |    |    |    | 91.7 | 87.0    |           | 2007      |
| <i>SALL3</i>                                                                    | Primary   | Sedimentation | 132 | 23/7 | Stage 0a-IV   | Mixed urologic diseases/healthy | MSP  | 45.6 | 72.0  | 100.0 | 100.0 |    |    |    | 58.3 | 100/100 |           | [17] 2007 |
| <i>CFTR</i>                                                                     | Primary   | Sedimentation | 132 | 23/7 | Stage 0a-IV   | Mixed urologic diseases/healthy | MSP  | 52.9 | 52.0  | 100.0 | 100.0 |    |    |    | 55.3 | 100/100 |           | 2007      |
| <i>ABCC6</i>                                                                    | Primary   | Sedimentation | 132 | 23/7 | Stage 0a-IV   | Mixed urologic                  | MSP  | 27.9 | 250.0 | 50.0  | 50.0  |    |    |    | 36.4 | 100/100 |           | 2007      |

|                |         |                   |     |      |                |                                           |     |          |      |          |       |  |      |              |          |
|----------------|---------|-------------------|-----|------|----------------|-------------------------------------------|-----|----------|------|----------|-------|--|------|--------------|----------|
|                |         |                   |     |      |                | diseases/h<br>ealthy                      |     |          |      |          |       |  |      |              |          |
| <i>HPR1</i>    | Primary | Sedimen<br>tation | 132 | 23/7 | Stage<br>0a-IV | Mixed<br>urologic<br>diseases/h<br>ealthy | MSP | 32.<br>4 | 42.0 | 0.0      | 50.0  |  | 34.8 | 100/100      | 20<br>07 |
| <i>BCL2</i>    | Primary | Sedimen<br>tation | 132 | 23/7 | Stage<br>0a-IV | Mixed<br>urologic<br>diseases/h<br>ealthy | MSP | 22.<br>1 | 34.0 | 0.0      | 50.0  |  | 27.3 | 100/100      | 20<br>07 |
| <i>ALX4</i>    | Primary | Sedimen<br>tation | 132 | 23/7 | Stage<br>0a-IV | Mixed<br>urologic<br>diseases/h<br>ealthy | MSP | 22.<br>1 | 24.0 | 50.<br>0 | 0.0   |  | 25   | 100/100      | 20<br>07 |
| <i>RUNX3</i>   | Primary | Sedimen<br>tation | 132 | 23/7 | Stage<br>0a-IV | Mixed<br>urologic<br>diseases/h<br>ealthy | MSP | 25.<br>0 | 44.0 | 25.<br>0 | 0.0   |  | 32.6 | 95.7<br>/100 | 20<br>07 |
| <i>ITGA4</i>   | Primary | Sedimen<br>tation | 132 | 23/7 | Stage<br>0a-IV | Mixed<br>urologic<br>diseases/h<br>ealthy | MSP | 23.<br>5 | 42.0 | 50.<br>0 | 50.0  |  | 31.1 | 95.7/100     | 20<br>07 |
| <i>RASSF1A</i> | Primary | Sedimen<br>tation | 132 | 23/7 | Stage<br>0a-IV | Mixed<br>urologic<br>diseases/h<br>ealthy | MSP | 27.<br>9 | 50.0 | 25.<br>0 | 100.0 |  | 35.6 | 91.3/100     | 20<br>07 |
| <i>MYOD1</i>   | Primary | Sedimen<br>tation | 132 | 23/7 | Stage<br>0a-IV | Mixed<br>urologic<br>diseases/h<br>ealthy | MSP | 17.<br>6 | 30.0 | 0.0      | 50.0  |  | 22   | 100/100      | 20<br>07 |
| <i>MT1A</i>    | Primary | Sedimen<br>tation | 132 | 23/7 | Stage<br>0a-IV | Mixed<br>urologic<br>diseases/h<br>ealthy | MSP | 32.<br>4 | 42.0 | 25.<br>0 | 50.0  |  | 34.8 | 91.3/100     | 20<br>07 |
| <i>DRM</i>     | Primary | Sedimen<br>tation | 132 | 23/7 | Stage<br>0a-IV | Mixed<br>urologic<br>diseases/h<br>ealthy | MSP | 22.<br>1 | 18.0 | 25.<br>0 | 0.0   |  | 18.9 | 100/100      | 20<br>07 |
| <i>BMP3B</i>   | Primary | Sedimen<br>tation | 132 | 23/7 | Stage<br>0a-IV | Mixed<br>urologic<br>diseases/h<br>ealthy | MSP | 13.<br>2 | 22.0 | 25.<br>0 | 0.0   |  | 15.9 | 100/100      | 20<br>07 |
| <i>CCNA1</i>   | Primary | Sedimen<br>tation | 132 | 23/7 | Stage<br>0a-IV | Mixed<br>urologic<br>diseases/h<br>ealthy | MSP | 10.<br>3 | 24.0 | 25.<br>0 | 0.0   |  | 15.9 | 100/100      | 20<br>07 |
| <i>CDH13</i>   | Primary | Sedimen<br>tation | 132 | 23/7 | Stage<br>0a-IV | Mixed<br>urologic<br>diseases/h<br>ealthy | MSP | 17.<br>6 | 18.0 | 25.<br>0 | 0.0   |  | 16.7 | 100/100      | 20<br>07 |
| <i>RPRM</i>    | Primary | Sedimen<br>tation | 132 | 23/7 | Stage<br>0a-IV | Mixed<br>urologic<br>diseases/h<br>ealthy | MSP | 13.<br>2 | 14.0 | 50.<br>0 | 0.0   |  | 14.4 | 100/100      | 20<br>07 |
| <i>MINT1</i>   | Primary | Sedimen<br>tation | 132 | 23/7 | Stage<br>0a-IV | Mixed<br>urologic                         | MSP | 8.8      | 14.0 | 25.<br>0 | 50.0  |  | 12.9 | 100/100      | 20<br>07 |

|                  |         |                |                   |     |      |                      |                                           |     |          |      |          |     |  |      |         |    |    |                  |
|------------------|---------|----------------|-------------------|-----|------|----------------------|-------------------------------------------|-----|----------|------|----------|-----|--|------|---------|----|----|------------------|
|                  |         |                |                   |     |      |                      | diseases/h<br>ealthy                      |     |          |      |          |     |  |      |         |    |    |                  |
| <i>BRCA1</i>     | Primary |                | Sedimen<br>tation | 132 | 23/7 | Stage<br>0a-IV       | Mixed<br>urologic<br>diseases/h<br>ealthy | MSP | 10.<br>3 | 16.0 | 25.<br>0 | 0.0 |  | 12.1 | 100/100 |    |    | 20<br>07         |
| <i>PTCHD2</i>    | Primary |                | Sedimen<br>tation | 132 | 23/7 | Stage<br>0a-IV       | Mixed<br>urologic<br>diseases/h<br>ealthy | MSP | 5.9      | 4.0  | 25.<br>0 | 0.0 |  | 5.3  | 100/100 |    |    | 20<br>07         |
| <i>TMS1</i>      | Primary |                | Sedimen<br>tation | 132 | 23/7 | Stage<br>0a-IV       | Mixed<br>urologic<br>diseases/h<br>ealthy | MSP | 2.9      | 4.0  | 0.0      | 0.0 |  | 3    | 100/100 |    |    | 20<br>07         |
| <i>GSTP1</i>     | Primary |                | Sedimen<br>tation | 132 | 23/7 | Stage<br>0a-IV       | Mixed<br>urologic<br>diseases/h<br>ealthy | MSP | 2.9      | 2.0  | 0.0      | 0.0 |  | 2.3  | 100/100 |    |    | 20<br>07         |
| <i>P14</i>       | Primary | Traini<br>ng   | Sedimen<br>tation | 8   | 10   | HG                   | Benign                                    | MSP |          |      |          |     |  |      | 50      |    | 25 | 20<br>06         |
| <i>P16</i>       | Primary | Traini<br>ng   | Sedimen<br>tation | 8   | 10   | HG                   | Benign                                    | MSP |          |      |          |     |  |      | 57      |    | 62 | 20<br>06         |
| <i>RASSF1</i>    | Primary | Traini<br>ng   | Sedimen<br>tation | 8   | 10   | HG                   | Benign                                    | MSP |          |      |          |     |  |      | 86      |    | 44 | 20<br>06         |
| <i>APC</i>       | Primary | Traini<br>ng   | Sedimen<br>tation | 8   | 10   | HG                   | Benign                                    | MSP |          |      |          |     |  |      | 86      |    | 20 | 20<br>06         |
| <i>GSTP1</i>     | Primary | Traini<br>ng   | Sedimen<br>tation | 8   | 10   | HG                   | Benign                                    | MSP |          |      |          |     |  |      | 50      |    | 14 | 20<br>06         |
| <i>E-cad</i>     | Primary | Traini<br>ng   | Sedimen<br>tation | 8   | 10   | HG                   | Benign                                    | MSP |          |      |          |     |  |      | 50      |    | 11 | 20<br>06         |
| <i>Cyclin D2</i> | Primary | Traini<br>ng   | Sedimen<br>tation | 8   | 10   | HG                   | Benign                                    | MSP |          |      |          |     |  |      | 37      |    | 0  | 20<br>06         |
| <i>CMI</i>       | Primary | Traini<br>ng   | Sedimen<br>tation | 8   | 10   | HG                   | Benign                                    | MSP |          |      |          |     |  |      | 100     |    | 50 | 20<br>06         |
| <i>P14</i>       | Primary | Valida<br>tion | Sedimen<br>tation | 32  | 5    | Not<br>specifie<br>d | Benign                                    | MSP |          |      |          |     |  |      |         | 48 | 40 | [88]<br>20<br>06 |
| <i>P16</i>       | Primary | Valida<br>tion | Sedimen<br>tation | 32  | 5    | Not<br>specifie<br>d | Benign                                    | MSP |          |      |          |     |  |      |         | 63 | 60 | 20<br>06         |
| <i>RASSF1</i>    | Primary | Valida<br>tion | Sedimen<br>tation | 32  | 5    | Not<br>specifie<br>d | Benign                                    | MSP |          |      |          |     |  |      |         | 59 | 80 | 20<br>06         |
| <i>APC</i>       | Primary | Valida<br>tion | Sedimen<br>tation | 32  | 5    | Not<br>specifie<br>d | Benign                                    | MSP |          |      |          |     |  |      |         | 55 | 0  | 20<br>06         |
| <i>GSTP1</i>     | Primary | Valida<br>tion | Sedimen<br>tation | 32  | 5    | Not<br>specifie<br>d | Benign                                    | MSP |          |      |          |     |  |      |         | 16 | 67 | 20<br>06         |
| <i>E-cad</i>     | Primary | Valida<br>tion | Sedimen<br>tation | 32  | 5    | Not<br>specifie<br>d | Benign                                    | MSP |          |      |          |     |  |      |         | 14 | 17 | 20<br>06         |
| <i>Cyclin D2</i> | Primary | Valida<br>tion | Sedimen<br>tation | 32  | 5    | Not<br>specifie<br>d | Benign                                    | MSP |          |      |          |     |  |      |         | 35 | 0  | 20<br>06         |

|                                              |           |            |               |    |     |                             |                                    |                  |    |     |     |  |  |  |  |  |  |                             |
|----------------------------------------------|-----------|------------|---------------|----|-----|-----------------------------|------------------------------------|------------------|----|-----|-----|--|--|--|--|--|--|-----------------------------|
| CMI                                          | Primary   | Validation | Sedimentation | 32 | 5   | Not specified               | Benign                             | MSP              |    |     |     |  |  |  |  |  |  | 2006                        |
| <i>miR-9-3, miR124-2, miR-124-3, miR-137</i> | Recurrent |            | Sedimentation | 25 | 107 | Ta-T1                       | No current recurrence              | Pyrosequencing   |    |     |     |  |  |  |  |  |  | [29] 2018                   |
| <i>miR-129-2/miR-663a</i>                    |           |            | Sedimentation | 49 | /25 | Papillary, invasive, LG, HG | Healthy                            | qMSP             |    |     |     |  |  |  |  |  |  | [89] 2017                   |
| <i>miR-137</i>                               |           | Training   | Sedimentation | 86 | 20  | ≥Ta, grade 1-3              | Cancer free, not further specified | qMSP             |    |     |     |  |  |  |  |  |  | 77.91 77.78 0.782 2013      |
| <i>miR-124-2</i>                             |           | Training   | Sedimentation | 86 | 20  | ≥Ta, grade 1-3              | Cancer free, not further specified | qMSP             |    |     |     |  |  |  |  |  |  | 69.77 88.89 0.769 2013      |
| <i>miR-124-3</i>                             |           | Training   | Sedimentation | 86 | 20  | ≥Ta, grade 1-3              | Cancer free, not further specified | qMSP             |    |     |     |  |  |  |  |  |  | [90] 65.12 97.22 0.805 2013 |
| <i>miR-9-3</i>                               |           | Training   | Sedimentation | 86 | 20  | ≥Ta, grade 1-3              | Cancer free, not further specified | qMSP             |    |     |     |  |  |  |  |  |  | 69.41 86.11 0.778 2013      |
| <i>OTX1, ONECUT2, TWIST</i>                  | Primary   |            | Sedimentation | 74 | 80  | Ta-T4, grade 1-3            | Benign causes of hematuria         | SNaPshot and MSP |    |     |     |  |  |  |  |  |  | 0.900 2016                  |
| <i>OTX1</i>                                  | Primary   |            | Sedimentation | 74 | 80  | Ta-T4, grade 1-3            | Benign causes of hematuria         | SNaPshot         |    |     |     |  |  |  |  |  |  | 69.2 62 0.656 2016          |
| <i>ONECUT2</i>                               | Primary   |            | Sedimentation | 74 | 80  | Ta-T4, grade 1-3            | Benign causes of hematuria         | SNaPshot         |    |     |     |  |  |  |  |  |  | [91] 77.9 81.8 0.799 2016   |
| <i>TWIST</i>                                 | Primary   |            | Sedimentation | 74 | 80  | Ta-T4, grade 1-3            | Benign causes of hematuria         | MSP              |    |     |     |  |  |  |  |  |  | 70 89.7 0.799 2016          |
| <i>APC_a, TERT_a, TERT_b, EDNRB</i>          | Recurrent | Training   | Sedimentation | 68 | 91  | Ta-T1, grade 1-3            | Non-BC urine                       | MS-MLPA          |    |     |     |  |  |  |  |  |  | 0.82 2012                   |
| <i>APC_a, TERT_a, TERT_b, EDNRB</i>          | Recurrent | Validation | Sedimentation | 49 | 60  | Ta-T1, grade 1-3            | No recurrence                      | MS-MLPA          | 53 | 100 | 100 |  |  |  |  |  |  | 51 100 63 58 0.69 [27] 2012 |
| <i>APC_a, TERT_a, TERT_b, EDNRB</i>          | Recurrent | Validation | Sedimentation | 65 | 29  | Ta-T4, grade 0-3            | No recurrence                      | MS-MLPA          | 71 | 100 | 83  |  |  |  |  |  |  | 68 100 72 55 2012           |
| <i>RASSF1A</i>                               | Primary   |            | Sedimentation | 14 | 10  | ≥Ta, grade 1-3              | Normal, not further specified      | MSP              |    |     |     |  |  |  |  |  |  | 40 55.6 50 100 [92] 2003    |

MSP = methylation specific PCR, qMSP = quantitative MSP, HG = high grade, LG = low grade, PUNLMP = papillary urothelial neoplasm of low malignant potential, NMIBC = nonmuscle invasive bladder cancer, MIBC = muscle invasive bladder cancer, BC = bladder cancer, MS-MLPA = methylation-specific multiplex ligation-dependent probe amplification, SNUPE = single-nucleotide primer extension, PIN = prostatic intraepithelial neoplasia, DRE = digital rectal examination, GS = Gleason score, MS-HRM = methylation-sensitive high-resolution melting.

Supplementary Table S2. Prostate cancer.

| Biomarkers                                    | Urine Collection | Sample Processing | Cancer (n) | Controls (n) | Pathology     | Control Population      | Method      | Overall   |           |         | Ref. | Year |
|-----------------------------------------------|------------------|-------------------|------------|--------------|---------------|-------------------------|-------------|-----------|-----------|---------|------|------|
|                                               |                  |                   |            |              |               |                         |             | Sens. (%) | Spec. (%) | AUC (%) |      |      |
| <i>PCDH17, TCF21</i>                          |                  | Sedimentation     | 50         | 48           | GS 6–9        | Healthy                 | qMSP        | 26        | 100       | 0.650   | [39] | 2011 |
| <i>PCDH17</i>                                 |                  | Sedimentation     | 50         | 48           | GS 6–9        | Healthy                 | qMSP        | 12        | 100       |         |      | 2011 |
| <i>TCF21</i>                                  |                  | Sedimentation     | 50         | 48           | GS 6–9        | Healthy                 | qMSP        | 20        | 100       |         |      | 2011 |
| <i>GDF15</i>                                  | Morning          | Sedimentation     | 20         | 20           | Not specified | Healthy                 | qMSP        | 20        | 100       |         |      | 2010 |
| <i>HSPA2</i>                                  | Morning          | Sedimentation     | 20         | 0            | Not specified | Healthy                 | qMSP        | 15        | 100       |         | [16] | 2010 |
| <i>TMEFF2</i>                                 | Morning          | Sedimentation     | 20         | 0            | Not specified | Healthy                 | qMSP        | 0         | 100       |         |      | 2010 |
| <i>VIM</i>                                    | Morning          | Sedimentation     | 20         | 0            | Not specified | Healthy                 | qMSP        | 5         | 100       |         |      | 2010 |
| <i>APC</i>                                    | Post DRE         | Sedimentation     | 145        | 123          | GS 6–10       | Benign                  | qMSP        |           |           | 0.617   |      | 2018 |
| <i>HOXD3</i>                                  | Post DRE         | Sedimentation     | 145        | 123          | GS 6–10       | Benign                  | qMSP        |           |           | 0.718   |      | 2018 |
| <i>TGFbeta2</i>                               | Post DRE         | Sedimentation     | 145        | 123          | GS 6–10       | Benign                  | qMSP        |           |           | 0.596   |      | 2018 |
| <i>GSTP1</i>                                  | Post DRE         | Sedimentation     | 145        | 123          | GS 6–10       | Benign                  | qMSP        |           |           | 0.605   | [93] | 2018 |
| <i>KLK10</i>                                  | Post DRE         | Sedimentation     | 145        | 123          | GS 6–10       | Benign                  | qMSP        |           |           | 0.552   |      | 2018 |
| <i>TBX15</i>                                  | Post DRE         | Sedimentation     | 145        | 123          | GS 6–10       | Benign                  | qMSP        |           |           | 0.502   |      | 2018 |
| <i>Procore</i>                                | Post DRE         | Sedimentation     | 145        | 123          | GS 6–10       | Benign                  | qMSP        |           |           | 0.730   |      | 2018 |
| <i>GSTP1, RARβ2, APC</i>                      | Morning          | Sedimentation     | 87         | 32           | T2-T3b        | Asymptomatic donors     | qMSP        | 94.3      | 84.4      |         |      |      |
| <i>miR-34b/c, miR-193b</i>                    | Morning          | Sedimentation     | 87         | 32           | T2-T3b        | Asymptomatic donors     | qMSP        | 95.4      | 84.4      |         | [33] | 2018 |
| <i>GSTP1, RARβ2, APC, miR-34b/c, miR-193b</i> | Morning          | Sedimentation     | 87         | 32           | T2-T3b        | Asymptomatic donors     | qMSP        | 100.0     | 75.0      |         |      | 2018 |
| <i>ADCY4</i>                                  | Post DRE         | Sedimentation     | 38         | 49           | GS 6–10       | Negative biopsy results | Nested qMSP | 61        | 78        |         |      | 2018 |
| <i>ADCY4</i>                                  | First Void       | Sedimentation     | 32         | 35           | GS 6–10       | Negative biopsy results | Nested qMSP | 56        | 69        |         |      | 2018 |
| <i>AOX1rc</i>                                 | Post DRE         | Sedimentation     | 38         | 49           | GS 6–10       | Negative biopsy results | Nested qMSP | 71        | 69        |         | [36] | 2018 |
| <i>AOX1rc</i>                                 | First Void       | Sedimentation     | 32         | 35           | GS 6–10       | Negative biopsy results | Nested qMSP | 44        | 83        |         |      | 2018 |
| <i>APC2</i>                                   | Post DRE         | Sedimentation     | 38         | 49           | GS 6–10       | Negative biopsy results | Nested qMSP | 26        | 90        |         |      | 2018 |

|                    |            |               |    |    |         |                         |             |    |     |      |
|--------------------|------------|---------------|----|----|---------|-------------------------|-------------|----|-----|------|
| <i>APC2</i>        | First Void | Sedimentation | 32 | 35 | GS 6–10 | Negative biopsy results | Nested qMSP | 13 | 91  | 2018 |
| <i>CXCL14</i>      | Post DRE   | Sedimentation | 38 | 49 | GS 6–10 | Negative biopsy results | Nested qMSP | 21 | 100 | 2018 |
| <i>CXCL14</i>      | First Void | Sedimentation | 32 | 35 | GS 6–10 | Negative biopsy results | Nested qMSP | 28 | 97  | 2018 |
| <i>CXCL14rc</i>    | Post DRE   | Sedimentation | 38 | 49 | GS 6–10 | Negative biopsy results | Nested qMSP | 16 | 100 | 2018 |
| <i>CXCL14rc</i>    | First Void | Sedimentation | 32 | 35 | GS 6–10 | Negative biopsy results | Nested qMSP | 13 | 100 | 2018 |
| <i>CXCL14 Comb</i> | Post DRE   | Sedimentation | 38 | 49 | GS 6–10 | Negative biopsy results | Nested qMSP | 24 | 100 | 2018 |
| <i>CXCL14 Comb</i> | First Void | Sedimentation | 32 | 35 | GS 6–10 | Negative biopsy results | Nested qMSP | 34 | 97  | 2018 |
| <i>EPHX3</i>       | Post DRE   | Sedimentation | 38 | 49 | GS 6–10 | Negative biopsy results | Nested qMSP | 66 | 71  | 2018 |
| <i>EPHX3</i>       | First Void | Sedimentation | 32 | 35 | GS 6–10 | Negative biopsy results | Nested qMSP | 56 | 69  | 2018 |
| <i>KIFC2</i>       | Post DRE   | Sedimentation | 38 | 49 | GS 6–10 | Negative biopsy results | Nested qMSP | 66 | 78  | 2018 |
| <i>KIFC2</i>       | First Void | Sedimentation | 32 | 35 | GS 6–10 | Negative biopsy results | Nested qMSP | 56 | 80  | 2018 |
| <i>KIFC2rc</i>     | Post DRE   | Sedimentation | 38 | 49 | GS 6–10 | Negative biopsy results | Nested qMSP | 53 | 86  | 2018 |
| <i>KIFC2rc</i>     | First Void | Sedimentation | 32 | 35 | GS 6–10 | Negative biopsy results | Nested qMSP | 34 | 91  | 2018 |
| <i>KIFC2 Comb</i>  | Post DRE   | Sedimentation | 38 | 49 | GS 6–10 | Negative biopsy results | Nested qMSP | 79 | 69  | 2018 |
| <i>KIFC2 Comb</i>  | First Void | Sedimentation | 32 | 35 | GS 6–10 | Negative biopsy results | Nested qMSP | 66 | 77  | 2018 |
| <i>GFRA2</i>       | Post DRE   | Sedimentation | 38 | 49 | GS 6–10 | Negative biopsy results | Nested qMSP | 45 | 84  | 2018 |
| <i>GFRA2</i>       | First Void | Sedimentation | 32 | 35 | GS 6–10 | Negative biopsy results | Nested qMSP | 41 | 83  | 2018 |
| <i>GSTP1</i>       | Post DRE   | Sedimentation | 38 | 49 | GS 6–10 | Negative biopsy results | Nested qMSP | 47 | 82  | 2018 |
| <i>GSTP1</i>       | First Void | Sedimentation | 32 | 35 | GS 6–10 | Negative biopsy results | Nested qMSP | 47 | 83  | 2018 |
| <i>HEMK1</i>       | Post DRE   | Sedimentation | 38 | 49 | GS 6–10 | Negative biopsy results | Nested qMSP | 39 | 94  | 2018 |
| <i>HEMK1</i>       | First Void | Sedimentation | 32 | 35 | GS 6–10 | Negative biopsy results | Nested qMSP | 25 | 91  | 2018 |
| <i>HOXA7</i>       | Post DRE   | Sedimentation | 38 | 49 | GS 6–10 | Negative biopsy results | Nested qMSP | 84 | 80  | 2018 |
| <i>HOXA7</i>       | First Void | Sedimentation | 32 | 35 | GS 6–10 | Negative biopsy results | Nested qMSP | 66 | 66  | 2018 |
| <i>HOXB5</i>       | Post DRE   | Sedimentation | 38 | 49 | GS 6–10 | Negative biopsy results | Nested qMSP | 76 | 82  | 2018 |



|                   |            |               |    |    |         |                         |             |    |    |      |
|-------------------|------------|---------------|----|----|---------|-------------------------|-------------|----|----|------|
| <i>HOXB5</i>      | First Void | Sedimentation | 32 | 35 | GS 6–10 | Negative biopsy results | Nested qMSP | 72 | 66 | 2018 |
| <i>HOXB5rc</i>    | Post DRE   | Sedimentation | 38 | 49 | GS 6–10 | Negative biopsy results | Nested qMSP | 71 | 71 | 2018 |
| <i>HOXB5rc</i>    | First Void | Sedimentation | 32 | 35 | GS 6–10 | Negative biopsy results | Nested qMSP | 69 | 66 | 2018 |
| <i>HOXB5 Comb</i> | Post DRE   | Sedimentation | 38 | 49 | GS 6–10 | Negative biopsy results | Nested qMSP | 84 | 59 | 2018 |
| <i>HOXB5 Comb</i> | First Void | Sedimentation | 32 | 35 | GS 6–10 | Negative biopsy results | Nested qMSP | 88 | 57 | 2018 |
| <i>HOXD3a</i>     | Post DRE   | Sedimentation | 38 | 49 | GS 6–10 | Negative biopsy results | Nested qMSP | 50 | 92 | 2018 |
| <i>HOXD3a</i>     | First Void | Sedimentation | 32 | 35 | GS 6–10 | Negative biopsy results | Nested qMSP | 47 | 86 | 2018 |
| <i>HOXD3b</i>     | Post DRE   | Sedimentation | 38 | 49 | GS 6–10 | Negative biopsy results | Nested qMSP | 76 | 76 | 2018 |
| <i>HOXD3b</i>     | First Void | Sedimentation | 32 | 35 | GS 6–10 | Negative biopsy results | Nested qMSP | 97 | 60 | 2018 |
| <i>HOXD9</i>      | Post DRE   | Sedimentation | 38 | 49 | GS 6–10 | Negative biopsy results | Nested qMSP | 68 | 59 | 2018 |
| <i>HOXD9</i>      | First Void | Sedimentation | 32 | 35 | GS 6–10 | Negative biopsy results | Nested qMSP | 63 | 71 | 2018 |
| <i>HOXD10</i>     | Post DRE   | Sedimentation | 38 | 49 | GS 6–10 | Negative biopsy results | Nested qMSP | 61 | 86 | 2018 |
| <i>HOXD10</i>     | First Void | Sedimentation | 32 | 35 | GS 6–10 | Negative biopsy results | Nested qMSP | 53 | 77 | 2018 |
| <i>MOXD1</i>      | Post DRE   | Sedimentation | 38 | 49 | GS 6–10 | Negative biopsy results | Nested qMSP | 42 | 84 | 2018 |
| <i>MOXD1</i>      | First Void | Sedimentation | 32 | 35 | GS 6–10 | Negative biopsy results | Nested qMSP | 47 | 91 | 2018 |
| <i>NEUROG3</i>    | Post DRE   | Sedimentation | 38 | 49 | GS 6–10 | Negative biopsy results | Nested qMSP | 37 | 86 | 2018 |
| <i>NEUROG3</i>    | First Void | Sedimentation | 32 | 35 | GS 6–10 | Negative biopsy results | Nested qMSP | 22 | 94 | 2018 |
| <i>NODAL</i>      | Post DRE   | Sedimentation | 38 | 49 | GS 6–10 | Negative biopsy results | Nested qMSP | 63 | 82 | 2018 |
| <i>NODAL</i>      | First Void | Sedimentation | 32 | 35 | GS 6–10 | Negative biopsy results | Nested qMSP | 50 | 80 | 2018 |
| <i>NODALrc</i>    | Post DRE   | Sedimentation | 38 | 49 | GS 6–10 | Negative biopsy results | Nested qMSP | 53 | 84 | 2018 |
| <i>NODALrc</i>    | First Void | Sedimentation | 32 | 35 | GS 6–10 | Negative biopsy results | Nested qMSP | 31 | 80 | 2018 |
| <i>NODAL Comb</i> | Post DRE   | Sedimentation | 38 | 49 | GS 6–10 | Negative biopsy results | Nested qMSP | 79 | 71 | 2018 |
| <i>NODAL Comb</i> | First Void | Sedimentation | 32 | 35 | GS 6–10 | Negative biopsy results | Nested qMSP | 59 | 69 | 2018 |
| <i>RASSF5</i>     | Post DRE   | Sedimentation | 38 | 49 | GS 6–10 | Negative biopsy results | Nested qMSP | 24 | 94 | 2018 |

|                                             |            |                   |    |    |         |                                   |             |      |       |      |      |
|---------------------------------------------|------------|-------------------|----|----|---------|-----------------------------------|-------------|------|-------|------|------|
| <i>RASSF5</i>                               | First Void | Sedimentation     | 32 | 35 | GS 6–10 | Negative biopsy results           | Nested qMSP | 28   | 100   |      | 2018 |
| <i>RASSF5rc</i>                             | Post DRE   | Sedimentation     | 38 | 49 | GS 6–10 | Negative biopsy results           | Nested qMSP | 26   | 88    |      | 2018 |
| <i>RASSF5rc</i>                             | First Void | Sedimentation     | 32 | 35 | GS 6–10 | Negative biopsy results           | Nested qMSP | 34   | 86    |      | 2018 |
| <i>RASSF5 Comb</i>                          | Post DRE   | Sedimentation     | 38 | 49 | GS 6–10 | Negative biopsy results           | Nested qMSP | 45   | 82    |      | 2018 |
| <i>RASSF5 Comb</i>                          | First Void | Sedimentation     | 32 | 35 | GS 6–10 | Negative biopsy results           | Nested qMSP | 59   | 86    |      | 2018 |
| >= 6 positive of 19 markers                 | Post DRE   | Sedimentation     | 38 | 49 | GS 6–10 | Negative biopsy results           | Nested qMSP | 89   | 71    |      | 2018 |
| >= 6 positive of 19 markers                 | First Void | Sedimentation     | 32 | 35 | GS 6–10 | Negative biopsy results           | Nested qMSP | 94   | 71    |      | 2018 |
| <i>GSTP1</i>                                | Post DRE   | Filtration (8 µm) | 38 | 20 | GS 6–10 | Negative biopsy results           | qMSP        | 41.9 | 82.4  |      | 2018 |
| <i>APC</i>                                  | Post DRE   | Filtration (8 µm) | 38 | 20 | GS 6–10 | Negative biopsy results           | qMSP        | 41.9 | 94.1  |      | 2018 |
| <i>RASSF1A</i>                              | Post DRE   | Filtration (8 µm) | 38 | 20 | GS 6–10 | Negative biopsy results           | qMSP        | 64.5 | 35.3  |      | 2018 |
| <i>PITX2</i>                                | Post DRE   | Filtration (8 µm) | 38 | 20 | GS 6–10 | Negative biopsy results           | qMSP        | 16.1 | 100   |      | 2018 |
| <i>C1orf114</i>                             | Post DRE   | Filtration (8 µm) | 38 | 20 | GS 6–10 | Negative biopsy results           | qMSP        | 25.8 | 100   |      | 2018 |
| <i>GSTP1, APC, RASSF1A, PITX2, C1orf114</i> | Post DRE   | Filtration (8 µm) | 38 | 20 | GS 6–10 | Negative biopsy results           | qMSP        | 80.7 | 17.65 |      | 2018 |
| <i>GSTP1</i>                                | Pre DRE    | Filtration (8 µm) | 74 | 25 | GS 6–10 | Negative biopsy results           | qMSP        | 21.3 | 76.5  | [49] | 2018 |
| <i>APC</i>                                  | Pre DRE    | Filtration (8 µm) | 74 | 25 | GS 6–10 | Negative biopsy results           | qMSP        | 17.0 | 94.1  |      | 2018 |
| <i>RASSF1A</i>                              | Pre DRE    | Filtration (8 µm) | 74 | 25 | GS 6–10 | Negative biopsy results           | qMSP        | 46.8 | 41.2  |      | 2018 |
| <i>PITX2</i>                                | Pre DRE    | Filtration (8 µm) | 74 | 25 | GS 6–10 | Negative biopsy results           | qMSP        | 4.3  | 100   |      | 2018 |
| <i>C1orf114</i>                             | Pre DRE    | Filtration (8 µm) | 74 | 25 | GS 6–10 | Negative biopsy results           | qMSP        | 6.4  | 100   |      | 2018 |
| <i>GSTP1, APC, RASSF1A, PITX2, C1orf114</i> | Pre DRE    | Filtration (8 µm) | 74 | 25 | GS 6–10 | Negative biopsy results           | qMSP        | 59.6 | 29.4  |      | 2018 |
| <i>miR-34b/c</i>                            | No DRE     | Sedimentation     | 95 | 46 | ≥GS 6   | No urological malignancy, healthy | qMSP        | 89.5 | 47.8  | 0.69 | 2017 |
| <i>miR-193b</i>                             | No DRE     | Sedimentation     | 95 | 46 | ≥GS 6   | No urological malignancy, healthy | qMSP        | 91.6 | 95.7  | 0.96 | 2017 |

|                                       |          |               |     |    |                 |                                     |                |      |      |       |      |      |
|---------------------------------------|----------|---------------|-----|----|-----------------|-------------------------------------|----------------|------|------|-------|------|------|
| <i>miR-34b/c+ miR-193b</i>            | No DRE   | Sedimentation | 95  | 46 | ≥GS 6           | No urological malignancy, healthy   | qMSP           | 90.5 | 97.8 | 0.97  |      | 2017 |
| <i>cg05163709</i>                     | Post DRE | Sedimentation | 62  | 73 | Not specified   | Not specified                       | Pyrosequencing | 94.6 | 78.3 | 0.915 | [94] | 2015 |
| <i>cg27539833</i><br>(hypomethylated) | Post DRE | Sedimentation | 62  | 73 | Not specified   | Not specified                       | Pyrosequencing | 75   | 70.3 | 0.729 |      | 2015 |
| <i>GSTP1A</i>                         |          |               | 5   | 4  | GS 6            | Negative biopsy result              | qMSP           | 40   | 100  |       | [95] | 2015 |
| <i>GSTP1B</i>                         |          |               | 5   | 4  | GS 6            | Negative biopsy result              | qMSP           | 20   | 100  |       |      | 2015 |
| <i>RASSF1A</i>                        |          |               | 5   | 4  | GS 6            | Negative biopsy result              | qMSP           | 60   | 25   |       |      | 2015 |
| <i>RASSF1B</i>                        |          |               | 5   | 4  | GS 6            | Negative biopsy result              | qMSP           | 60   | 50   |       |      | 2015 |
| <i>APCA</i>                           |          |               | 5   | 4  | GS 6            | Negative biopsy result              | qMSP           | 0    | 100  |       |      | 2015 |
| <i>APCB</i>                           |          |               | 5   | 4  | GS 6            | Negative biopsy result              | qMSP           | 0    | 100  |       |      | 2015 |
| <i>DLEC1</i>                          | Post DRE | Sedimentation | 30  | 30 | Not specified   | BPH                                 | MSP            | 36.7 | NA   |       | [96] | 2015 |
| <i>RARB, GSTP1, RASSF1</i>            |          | Sedimentation | 253 | 32 | Not specified   | BPH                                 | qMSP           | 60.1 | NA   |       | [97] | 2014 |
| <i>RASSF1</i>                         |          | Sedimentation | 253 | 32 | Not specified   | BPH                                 | qMSP           | 44.7 | 84.4 |       |      | 2014 |
| <i>RARβ</i>                           |          | Sedimentation | 253 | 32 | Not specified   | BPH                                 | qMSP           | 29.2 | 81.3 |       |      | 2014 |
| <i>GSTP1</i>                          |          | Sedimentation | 253 | 32 | Not specified   | BPH                                 | qMSP           | 11.1 | 96.9 |       |      | 2014 |
| <i>APC</i>                            | Post DRE | Sedimentation | 10  | 5  | Organ confined  | Cancer free (not further specified) | qMSP           | 50   | 60   |       | [34] | 2014 |
| <i>HOXD3</i>                          | Post DRE | Sedimentation | 10  | 5  | Organ confined  | Cancer free (not further specified) | qMSP           | 100  | 100  |       |      | 2014 |
| <i>TGFB2</i>                          | Post DRE | Sedimentation | 10  | 5  | Organ confined  | Cancer free (not further specified) | qMSP           | 30   | 100  |       |      | 2014 |
| <i>TGFB2, HOXD3, APC</i>              | Post DRE | Sedimentation | 10  | 5  | Organ confined  | Cancer free (not further specified) | qMSP           | 100  | 60   |       |      | 2014 |
| <i>GSTP1</i>                          | Post DRE | Sedimentation | 14  | 52 | Biopsy positive | Biopsy negative                     | MSP            | 42.9 | 76.9 |       | [98] | 2013 |
| <i>RASSF1A</i>                        | Post DRE | Sedimentation | 14  | 52 | Biopsy positive | Biopsy negative                     | MSP            | 42.9 | 71.2 |       |      | 2013 |
| <i>GSTP1</i>                          | Catheter | Sedimentation | 34  |    | GS 6-7          |                                     | qMSP           | 3    | NA   |       | [99] | 2011 |
| <i>RARβ</i>                           | Catheter | Sedimentation | 34  |    | GS 6-7          |                                     | qMSP           | 44   | NA   |       |      | 2011 |
| <i>RASSF1</i>                         | Catheter | Sedimentation | 34  |    | GS 6-7          |                                     | qMSP           | 71   | NA   |       |      | 2011 |

|                            |                        |               |    |       |         |                                     |      |      |       |       |       |      |
|----------------------------|------------------------|---------------|----|-------|---------|-------------------------------------|------|------|-------|-------|-------|------|
| <i>RASSF1, GSTP1, RARβ</i> | Catheter               | Sedimentation | 34 |       | GS 6-7  |                                     | qMSP | 82   | NA    |       |       | 2011 |
| <i>GSTP1, RASSF1A</i>      | Post prostatic massage | Sedimentation | 34 | 79    | GS 6-10 | Negative biopsy                     | MSP  | 53.3 | 45.9  | 0.788 | [100] | 2010 |
| <i>GSTP1</i>               | Post DRE               | Sedimentation | 91 | 50/51 | GS 4-9  | Young asymptomatic/B iopsy negative | qMSP | 81   | 94/41 |       |       | 2009 |
| <i>RASSF2</i>              | Post DRE               | Sedimentation | 91 | 50/51 | GS 4-9  | Young asymptomatic/B iopsy negative | qMSP | 59   | 63/18 |       | [101] | 2009 |
| <i>HIST1H4K</i>            | Post DRE               | Sedimentation | 91 | 50/51 | GS 4-9  | Young asymptomatic/B iopsy negative | qMSP | 92   | 86/16 |       |       | 2009 |
| <i>TFAP2E</i>              | Post DRE               | Sedimentation | 91 | 50/51 | GS 4-9  | Young asymptomatic/B iopsy negative | qMSP | 100  | 18/0  |       |       | 2009 |
| <i>GSTP1</i>               | Post DRE               | Sedimentation | 24 | 69    | <6-10   | BPH                                 | qMSP | 75   | 98    |       | [102] | 2008 |
| <i>RASSF1a</i>             | Post prostatic massage | Sedimentation | 95 | 38    | GS 4-10 | Negative biopsy                     | qMSP | 77.9 | 92.1  | 0.85  |       | 2007 |
| <i>CDH1</i>                | Post prostatic massage | Sedimentation | 95 | 38    | GS 4-10 | Negative biopsy                     | qMSP | 30.5 | 94.7  |       |       | 2007 |
| <i>APC</i>                 | Post prostatic massage | Sedimentation | 95 | 38    | GS 4-10 | Negative biopsy                     | qMSP | 50.5 | 94.7  | 0.74  |       | 2007 |
| <i>DAPK</i>                | Post prostatic massage | Sedimentation | 95 | 38    | GS 4-10 | Negative biopsy                     | qMSP | 28.4 | 94.7  |       |       | 2007 |
| <i>MGMT</i>                | Post prostatic massage | Sedimentation | 95 | 38    | GS 4-10 | Negative biopsy                     | qMSP | 14.7 | 97.4  |       | [103] | 2007 |
| <i>p16</i>                 | Post prostatic massage | Sedimentation | 95 | 38    | GS 4-10 | Negative biopsy                     | qMSP | 11.6 | 94.7  |       |       | 2007 |
| <i>p14</i>                 | Post prostatic massage | Sedimentation | 95 | 38    | GS 4-10 | Negative biopsy                     | qMSP | 6.3  | 97.4  |       |       | 2007 |
| <i>GSTP1</i>               | Post prostatic massage | Sedimentation | 95 | 38    | GS 4-10 | Negative biopsy                     | qMSP | 83.2 | 86.8  | 0.86  |       | 2007 |
| <i>RARβ2</i>               | Post prostatic massage | Sedimentation | 95 | 38    | GS 4-10 | Negative biopsy                     | qMSP | 62.1 | 97.4  | 0.8   |       | 2007 |
| <i>TIMP3</i>               | Post prostatic massage | Sedimentation | 95 | 38    | GS 4-10 | Negative biopsy                     | qMSP | 43.2 | 100   |       |       | 2007 |

|                                   |                        |               |    |    |                                                              |                                      |      |    |       |       |            |
|-----------------------------------|------------------------|---------------|----|----|--------------------------------------------------------------|--------------------------------------|------|----|-------|-------|------------|
| <i>GSTP1, RASSF1a, RARβ2, APC</i> | Post prostatic massage | Sedimentation | 95 | 38 | GS 4–10                                                      | Negative biopsy                      | qMSP | 86 | NA    |       | 2007       |
| <i>APC</i>                        |                        | Sedimentation | 52 | 91 | GS 4–10                                                      | No history of genitourinary diseases | qMSP | 48 | 96    |       | 2005       |
| <i>ARF</i>                        |                        | Sedimentation | 52 | 91 | GS 4–10                                                      | No history of genitourinary diseases | qMSP | 37 | 100   |       | 2005       |
| <i>CDH1</i>                       |                        | Sedimentation | 52 | 91 | GS 4–10                                                      | No history of genitourinary diseases | qMSP | 77 | 94    |       | 2005       |
| <i>GSTP1</i>                      |                        | Sedimentation | 52 | 91 | GS 4–10                                                      | No history of genitourinary diseases | qMSP | 48 | 100   |       | 2005       |
| <i>MGMT</i>                       |                        | Sedimentation | 52 | 91 | GS 4–10                                                      | No history of genitourinary diseases | qMSP | 19 | 100   |       | 2005       |
| <i>p16</i>                        |                        | Sedimentation | 52 | 91 | GS 4–10                                                      | No history of genitourinary diseases | qMSP | 37 | 100   | [104] | 2005       |
| <i>RAR-2</i>                      |                        | Sedimentation | 52 | 91 | GS 4–10                                                      | No history of genitourinary diseases | qMSP | 35 | 91    |       | 2005       |
| <i>RASSF1A</i>                    |                        | Sedimentation | 52 | 91 | GS 4–10                                                      | No history of genitourinary diseases | qMSP | 73 | 89    |       | 2005       |
| <i>TIMP3</i>                      |                        | Sedimentation | 52 | 91 | GS 4–10                                                      | No history of genitourinary diseases | qMSP | 37 | 91    |       | 2005       |
| <i>p16, ARF, MGMT, GSTP1</i>      |                        | Sedimentation | 52 | 91 | GS 4–10                                                      | No history of genitourinary diseases | qMSP | 87 | 100   |       | 2005       |
| <i>GSTP1</i>                      | Post prostatic massage |               | 40 | 45 | Intracapsular cancer and locally advanced or systemic cancer | BPH                                  | MSP  | 73 | 98    | [105] | 2001       |
| <i>APC</i>                        | Post DRE               | Sedimentation | 97 | 83 | GS 6–9                                                       | BPH, PIN, Atypia                     | qMSP |    | 0.585 |       | 2009       |
| <i>GSTP1</i>                      | Post DRE               | Sedimentation | 97 | 83 | GS 6–9                                                       | BPH, PIN, Atypia                     | qMSP |    | 0.664 | [106] | 2009       |
| <i>RARβ2</i>                      | Post DRE               | Sedimentation | 97 | 83 | GS 6–9                                                       | BPH, PIN, Atypia                     | qMSP |    | 0.705 |       | 2009       |
| <i>RARβ2, GSTP1, APC</i>          | Post DRE               | Sedimentation | 97 | 83 | GS 6–9                                                       | BPH, PIN, Atypia                     | qMSP | 60 | 81    | 0.72  | 2009       |
| <i>GSTP1</i>                      | Post DRE               | Sedimentation | 54 | 67 | GS 4–10                                                      | Biopsy negative                      | qMSP | 33 | 95    | 0.65  | [107] 2008 |

|                          |                        |               |    |    |                             |                 |      |       |       |       |       |      |
|--------------------------|------------------------|---------------|----|----|-----------------------------|-----------------|------|-------|-------|-------|-------|------|
| <i>RARβ</i>              | Post DRE               | Sedimentation | 54 | 67 | GS 4–10                     | Biopsy negative | qMSP | 40    | 84    | 0.59  |       | 2008 |
| <i>APC</i>               | Post DRE               | Sedimentation | 54 | 67 | GS 4–10                     | Biopsy negative | qMSP | 36    | 91    | 0.59  |       | 2008 |
| <i>GSTP1, APC</i>        | Post DRE               | Sedimentation | 54 | 67 | GS 4–10                     | Biopsy negative | qMSP | 51    | 89    | 0.68  |       | 2008 |
| <i>GSTP1, APC, RARβ</i>  | Post DRE               | Sedimentation | 54 | 67 | GS 4–10                     | Biopsy negative | qMSP | 55    | 80    | 0.69  |       | 2008 |
| <i>GSTP1</i>             | Post DRE               | Sedimentation | 57 | 56 | GS 4–10                     | Biopsy negative | qMSP | 36    | 91    | 0.64  |       | 2008 |
| <i>RARβ</i>              | Post DRE               | Sedimentation | 57 | 56 | GS 4–10                     | Biopsy negative | qMSP | 29    | 91    | 0.64  |       | 2008 |
| <i>APC</i>               | Post DRE               | Sedimentation | 57 | 56 | GS 4–10                     | Biopsy negative | qMSP | 51    | 83    | 0.62  |       | 2008 |
| <i>GSTP1, APC</i>        | Post DRE               | Sedimentation | 57 | 56 | GS 4–10                     | Biopsy negative | qMSP | 53    | 80    | 0.67  |       | 2008 |
| <i>GSTP1, APC, RARβ</i>  | Post DRE               | Sedimentation | 57 | 56 | GS 4–10                     | Biopsy negative | qMSP | 53    | 76    | 0.65  |       | 2008 |
| <i>GSTP1</i>             | Post DRE/biopsy        | Sedimentation | 12 | 5  | GS 6–7                      | Biopsy Negative | MSP  | 25/17 | 80/80 |       |       | 2006 |
| <i>APC</i>               | Post DRE/biopsy        | Sedimentation | 12 | 5  | GS 6–7                      | Biopsy Negative | MSP  | 8/17  | 80/80 |       | [35]  | 2006 |
| <i>EDNRB</i>             | Post DRE/biopsy        | Sedimentation | 12 | 5  | GS 6–7                      | Biopsy Negative | MSP  | 63/88 | 25/40 |       |       | 2006 |
| <i>EDNRB, APC, GSTP1</i> | Post DRE/biopsy        | Sedimentation | 12 | 5  | GS 6–7                      | Biopsy Negative | MSP  | 100   | 40    |       |       | 2006 |
| <i>GSTP1</i>             | Post biopsy            | Sedimentation | 18 | 18 | Not specified               | Negative Biopsy | MSP  | 58    | 39    |       | [108] | 2003 |
| <i>GSTP1</i>             |                        | Sedimentation | 69 | 31 | Not specified               | BPH             | qMSP | 18.8  | 96.8  |       |       | 2002 |
| <i>GSTP1</i>             |                        | Sedimentation | 69 | 31 | Not specified               | BPH             | MSP  | 30.4  | 96.8  |       | [109] | 2002 |
| <i>GSTP1</i>             | Post Prostatic massage |               | 11 | 10 | Not specified               | BPH             | MSP  | 36    | 100   |       |       | 2001 |
| <i>GSTP1</i>             | Post Prostatic massage |               | 29 | 40 | Not specified               | BPH             | MSP  | 76    | 97    |       | [110] | 2001 |
| <i>GSTP1</i>             | Post DRE               |               | 65 | 45 | Clinically localized cancer | BPH             | MSP  | 97.8  | 88.9  | 0.936 | [111] | 2013 |

MSP = methylation specific PCR, qMSP = quantitative MSP, DRE = digital rectal examination, GS = Gleason score, PIN = prostatic intraepithelial neoplasia, BPH = benign prostate hyperplasia
